# Supplementary material for: A new defoliating threat to eucalyptus plantations: biology and foliar consumption of Physocleora dukinfeldia (Lepidoptera: Geometridae)
Source: PeerJ. 2026 Jan 12;14:e20589. doi: 10.7717/peerj.20589 (PMC12805907; doi:10.7717/peerj.20589)
Supplement: Supplemental Information 1 [file peerj-14-20589-s001.xlsx]

## Sheet: Eucalyptus - T1
Biology of Physocloera dukinfeldia in E. urograndis
	1	2	3	4	5	6	7	8	9	10	11	12	13	14	15	16	17	18	19	20	21	22	23	24	25	26	27	28	29	30	31	32	33	34	35	36	37	38	39	40	41	42	43	44	45	46	47	48	49
R1	1	1	1	1	2	2	2	3	3	3	3	3	3	3	3	3	3	3	3	3	3	3	4	4	4	4	4	4	4	4	4	4	4	4	5	5	5	5	5	5	5	5	5	+
R2	1	1	1	1	2	2	2	3	3	3	3	4	4	4	5	5	5	6	6	6	6	6	6	6	6	6	6	7	7	7	8	8	8	8	8	8	8	8	8	8	8	8	8	8	9	9	9	9	+
R3	1	1	1	1	2	2	2	3	3	3	3	4	4	4	4	4	4	5	5	5	5	5	6	6	6	6	6	6	6	6	6	6	7	7	8	8	8	8	8	8	8	8	8	8	9	9	9	9	9
R4	-
R5	1	1	1	1	2	2	2	3	3	3	4	4	4	4	4	5	5	6	6	6	6	6	6	6	7	7	8	8	8	8	8	8	8	8	8	8	8	8	8	8	8	8	9	9	9	9	9	9	9
R6	-
R7	1	1	1	1	1	2	2	2	3	3	3	3	4	4	4	4	4	4	4	4	5	5	5	5	5	6	6	6	6	6	6	6	6	6	6	7	7	8	8	8	8	8	8	8	8	8	8	8	8
R8	-
R9	-
R10	-
R11	-
R12	-
R13	1	1	1	1	2	2	2	2	3	3	3	3	4	4	4	5	5	5	5	5	6	6	6	6	6	6	6	6	6	7	8	8	8	8	8	8	8	8	8	8	8	8	8	8	8	8	9	9	9
R14	-
R15	-
R16	-
R17	1	1	1	1	1	1	1	1	1	1	1	1	1	1	+
R18	1	1	1	1	2	2	2	2	3	3	3	3	3	3	4	4	4	4	4	4	4	5	5	5	5	5	5	5	5	5	6	6	6	6	6	6	6	6	6	6	6	6	6	6	6	6	6	6	6
R19	1	1	1	1	1	1	1	1	1	1	1	1	1	1	+
R20	1	1	1	1	2	2	2	2	3	3	3	3	3	3	3	4	4	4	4	4	5	5	5	5	6	6	6	6	6	6	6	6	6	6	6	7	7	8	8	8	8	8	8	8	8	8	8	8	8
R21	-
R22	1	1	1	1	2	2	2	2	3	3	3	4	4	4	4	4	4	4	4	5	5	5	5	6	6	6	6	6	6	7	7	7	7	7	7	8	8	8	8	8	8	8	8	8	8	8	9	9	9
R23	1	1	1	1	2	2	2	3	3	3	3	3	4	4	4	5	5	5	5	5	5	5	5	6	6	6	6	6	6	6	6	6	6	7	7	7	+
R24	1	1	1	1	1	2	2	2	3	3	3	3	4	4	4	4	4	4	4	4	5	5	5	5	5	6	6	6	6	6	6	6	6	6	6	7	7	8	8	8	8	8	8	8	8	8	8	8	8
R25	-
R26	-
R27	-
R28	1	1	1	1	2	2	2	3	3	3	3	3	4	4	4	4	4	5	5	5	5	5	5	6	6	6	6	6	6	6	6	6	6	6	6	6	6	6	6	6	7	8	8	8	8	8	8	8	8
R29	-
R30	1	1	1	1	2	2	2	3	3	3	3	3	4	4	4	4	4	4	5	5	5	5	5	6	6	6	6	6	6	6	6	6	6	6	6	6	7	7	7	8	8	8	8	8	8	8	8	8	8
R31	1	1	1	1	1	1	1	1	1	+
R32	1	1	1	1	2	2	2	2	3	3	3	3	4	4	4	4	4	4	4	4	5	5	5	6	6	6	6	6	6	7	7	7	7	7	7	8	8	8	8	8	8	8	8	8	8	8	8	8	8
R33	1	1	1	1	1	2	2	2	2	2	3	3	3	4	4	4	4	4	5	5	5	5	6	6	6	6	6	6	6	6	6	6	7	8	8	8	8	8	8	8	8	8	8	8	8	8	8	8	8
R34	-
R35	1	1	1	1	2	2	2	2	3	3	3	3	4	4	4	4	4	4	5	5	5	5	5	6	+
R36	1	1	1	1	1	1	1	1	+
R37	1	1	1	1	1	2	2	2	2	2	2	2	3	3	3	3	3	3	3	4	4	4	4	4	4	4	4	4	4	4	5	5	5	5	6	6	6	6	6	6	6	6	6	6	7	7	8	8	8
R38	1	1	1	1	1	1	1	1	1	1	1	1	1	2+
R39	1	1	1	1	1	1	1	1	+
R40	1	1	1	1	1	+
R41	-
R42	1	1	1	1	1	1	1	1	1	+
R43	1	1	1	1	1	1	1	1	+
R44	-
R45	1	1	1	1	1	1	1	1	1	1	1	1	+
R46	1	1	1	1	1	1	1	1	1	1	1	1	1	+
R47	-
R48	1	1	1	1	1	1	1	1	1	+
R49	-
R50	1	1	1	1	1	1	1	+
R51	1	1	1	1	1	2	2	2	2	2	3	3	3	3	4	4	4	4	4	4	5	5	5	5	6	6	6	6	6	6	6	6	6	6	6	6	6	6	6	6	6	6	6	7	8	8	8	8	8
R52	1	1	1	1	1	+
R53	-
R54	-
R55	1	1	1	1	2	2	2	2	3	3	3	3	3	3	4	4	4	4	4	4	5	+
R56	-
R57	1	1	1	1	1	2	2	2	2	2	2	2	2	3+
R58	-
R59	-
60	-
61	1	1	1	1	+
62	-
63	-
64	1	1	1	1	1	1	1	1	2	2	2	3	3	3	3	+
65	1	1	1	1	1	1	1	1	+
66	1	1	1	1	+
67	1	1	1	1	2	2	2	3	3	3	3	4	4	4	4	4	4	4	4	4	5	5	5	5	6	6	6	6	6	7	7	7	8	8	8	8	8	8	8	8	8	8	8	8	8	8	8	8	9
68	-
69	1	1	1	1	1	2	2	2	2	3	3	3	4	4	4	4	4	4	4	5	5	5	6	6	6	6	6	6	6	6	+
70	1	1	1	1	+
71	-
72	1	1	1	1	1	1	1	1	1	1	1	1	1	1	1	1	+
73	1	1	1	1	2	2	2	2	2	2	2	2	3	3	3	3	3	3	3	4	4	4	4	4	5	5	6	6	6	6	6	6	6	6	6	6	6	7	7	8	8	8	8	8	8	8	8	8	8
74	-
75	1	1	1	1	2	2	2	2	2	2	2	2	3	3	4	4	4	4	4	5	5	5	5	5	6	6	6	6	6	6	6	6	6	6	6	7	7	7	7	8	+
76	1	1	1	1	2	2	2	2	2	3	3	3	3	3	3	3	4	4	4	5	5	5	5	5	6
77	1	1	1	1	2	2	2	2	3	3	3	3	4	4	4	4	5	5	5	5	5	6	6	6	6	6	6	6	6	6	6	6	7	7	8	8	8	8	8	8	8	8	8	8	8	8	8	8	8
78	-
79	1	1	1	1	1	2	2	2	3	3	3	3	4	4	4	5	5	5	5	5	5	6	6	6	6	6	6	6	6	6	6	7	8	8	8	8	8	8	8	8	8	8	8	8	8	8	8	8	8
80	1	1	1	1	1	2	2	2	2	2	3	3	3	3	3	3	3	3	3	3	3	3	4	4	4	5	5	5	5	5	5	5	6
81	-
82	-
83	1	1	1	1	1	2	2	2	3	3	3	4	4	4	4	4	4	5	5	5	5	5	5	6	+
84	1	1	1	1	1	2	2	2	2	2	2	3	3	3	3	3	3	3	3	3	4	4	4	5	5	5	5	6	6	6	6	6	6	6	6	6	6	6	6	6	7	7	7	8	8	8	8	8	8
85	-
86	1	1	1	1	1	1	1	1	1	1	1	1	1	1	1	1	1	1	+
87	1	1	1	1	2	2	2	2	3	3	3	3	4	4	4	5	5	5	5	5	6	6	6	6	6	6	6	6	6	6	6	6	6	6	6	6	7	7	8	8	8	8	8	8	8	8	8	8	8
88	1	1	1	1	1	2	2	2	3	3	3	3	4	4	4	4	4	4	4	4	5	5	5	5	5	6	6	6	6	6	6	6	6	6	7	7	8	8	8	8	8	8	8	8	8	8	8	8	8
89	1	1	1	1	1	1	1	+
90	-
91	1	1	1	1	1	1	1	1	+
92	1	1	1	1	1	2	2	2	2	3	3	3	4	4	4	4	4	4	4	5	5	5	5	5	5	5	5	5	5	6	6	6	+
93	-
94	1	1	1	1	1	+
95	1	1	1	1	1	2	2	2	2	3	3	3	3	4	4	4	4	4	4	5	5	5	5	6	6	6	6	6	6	6	6	6	6	6	6	6	6	6	6	7	7	8	8	8	8	8	8	8	8
96	1	1	1	1	1	1	1	1	1	1	2	2	2	3	3	3	4	4	4	4	5	5	5	5	5	5	5	6	6	6	6	6	6	6	6	6	6	6	6	6	7	7	8	8	8	8	8	8	8
97	1	1	1	1	1	2	2	2	2	2	2	2	3	3	3	3	3	3	3	3	4	4	4	4	4	4	4	4	4	4	5	5	5	5	5	6	6	6	6	6	6	6	6	7	7	8	8	8	8
98	1	1	1	1	1	2	2	2	2	2	2	2	3	3	3	4	4	4	4	4	5	5	5	5	5	6	6	6	6	6	6	6	6	6	6	6	6	6	6	6	6	6	6	6	6	7	7	8	8
99	1	1	1	1	1	2	2	2	2	2	2	2	3	3	3	4	4	4	4	4	5	5	5	5	5	6	6	6	6	6	6	6	6	6	6	6	6	6	6	6	6	6	6	6	7	7	8	8	8
100	1	1	1	1	1	+
[truncated: 33 more columns]

## Sheet: T2 - S. terebinthifolia
Biology of Physocloera dukinfeldia in S. terebinthifolia
	1	2	3	4	5	6	7	8	9	10	11	12	13	14	15	16	17	18	19	20	21	22	23	24	25	26	27	28	29	30	31	32	33	34	35	36	37	38	39	40	41	42	43	44	45	46	47	48	49
R1	1	1	1	1	1	1	2	2	2	2	+
R2	-
R3	1	1	1	+
R4	1	1	1	1	1	1	2	2	2	2	3	3	3	4	4	4	5	5	5	5	6	6	6	6	6	6	6	6	6	6	6	6	6	6	6	6	7	7	8	8	8	8	8	8	8	8	8	8	8
R5	1	1	1	1	1	1	2	2	2	3	3	3	4	4	4	4	5	5	5	5	5	6	6	6	6	6	6	6	6	6	7	8	8	8	8	8	8	8	8	8	8	8	8	8	8	9	9	9	9
R6	1	1	1	1	1	1	1	1	1	2	2	2	2	2	+
R7	1	1	1	1	1	1	+
R8	-
R9	1	1	1	1	1	1	+
R10	1	1	1	1	1	1	1	2	2	3	3	3	4	4	4	4	5	5	5	5	5	6	6	6	6	6	6	6	7	7	8	8	8	8	8	8	8	8	8	8	8	8	8	8	8	8	9	+
R11	1	1	1	1	1	1	2	2	2	3	3	3	3	4	4	4	4	5	5	5	5	5	5	6	6	6	6	6	6	7	7	8	8	8	8	8	8	8	8	8	8	8	8	8	8	9	9	9	9
R12	1	1	1	1	1	1	2	2	2	3	3	3	3	3	3	3	4	4	4	4	5	5	5	6	6	6	6	6	6	7	7	7	8	8	8	8	8	8	8	8	8	8	8	8	8	8	9	9	9
R13	1	1	1	1	1	2	2	2	2	2	3	3	4	4	4	4	5	5	5	5	5	5	5	6	6	6	6	6	6	6	6	6	6	6	6	6	6	6	7	7	8	9	9	9	9	9	9	9	9
R14	1	1	1	1	1	1	+
R15	1	1	1	1	1	1	+
R16	1	1	1	1	2	2	2	3	3	3	4	4	4	4	5	5	5	5	5	5	5	6	6	6	6	6	6	6	6	7	7	8	8	8	8	8	8	8	8	8	8	8	8	8	8	8	8	9	9
R17	1	1	+
R18	-
R19	1	1	1	1	1	1	1	1	1	1	+
R20	1	1	1	1	1	2	2	2	2	3	3	4	4	4	5	5	5	5	5	6	6	6	6	6	6	6	6	6	6	6	6	6	6	6	7	7	8	8	8	8	8	8	8	8	8	8	8	8	8
R21	1	1	1	1	1	+
R22	1	1	1	1	1	+
R23	1	1	1	1	1	1	1	+
R24	1	1	1	1	2	2	2	2	2	2	2	3	3	3	3	3	3	3	3	4	4	4	5	5	5	5	5	5	6	+
R25	-
R26	1	1	1	1	1	+
R27	1	1	1	1	1	1	1	2	2	2	2	3	3	3	3	3	4	4	4	5	5	5	5	6	6	6	6	6	6	6	6	6	6	6	6	6	6	6	7	7	8	8	8	8	8	8	8	8	8
R28	1	1	1	1	1	+
R29	1	1	1	1	1	+
R30	1	1	1	1	1	+
R31	1	1	+
R32	1	1	1	1	1	2	2	2	2	2	2	3	3	3	3	3	3	3	3	4	4	5	5	5	5	5	5	5	5	5	5	5	5	5	5	5	5	5	5	5	5	5	5	5	5	5	5	5	5
R33	1	1	1	1	1	2	2	2	2	2	3	3	3	3	3	3	4	4	4	4	5	5	5	5	5	6	6	6	6	6	6	6	6	6	6	6	6	6	7	8	8	8	8	8	8	8	8	8	8
R34	1	1	1	1	1	1	+
R35	1	1	1	1	1	2	2	2	3	3	3	4	4	4	4	4	5	5	5	5	5	5	6	6	6	6	6	6	7	8	8	8	8	8	8	8	8	8	8	8	8	8	9	9	9	9	9	9	9
R36	1	1	1	1	2	2	2	2	3	3	4	4	4	4	5	5	5	5	5	5	5	5	5	6	6	6	6	6	6	7	7	8	8	8	8	8	8	8	8	8	8	8	8	8	8	8	9	9	9
R37	-
R38	1	1	1	1	2	2	2	2	3	3	4	4	4	4	5	5	5	5	5	5	5	5	5	6	6	6	6	6	6	7	7	8	8	8	8	8	8	8	8	8	8	8	8	8	8	8	9	9	9
R39	1	1	1	1	1	1	2	2	2	3	3	3	4	4	4	4	4	5	5	5	6	6	6	6	6	6	7	7	8	8	8	8	8	8	8	8	8	8	8	8	8	8	8	9	9	9	9	9	9
R40	1	1	1	1	2	2	2	3	3	3	4	4	4	4	5	5	5	6	6	6	6	6	6	6	6	6	6	7	8	8	8	8	8	8	8	8	8	8	8	8	8	8	9	+
R41	1	1	1	1	2	2	2	3	3	3	4	4	4	4	4	4	5	5	5	5	5	6	6	6	6	7	7	7	8	8	8	8	8	8	8	8	8	8	8	8	8	8	8	8	9	9	9	+
R42	-
R43	1	1	1	1	1	1	1	2	2	3	3	3	4	4	4	4	5	5	5	5	5	6	6	6	6	7	8	8	8	8	8	8	8	8	8	8	8	8	8	8	9	9	9	9	9	9	+
R44	1	1	1	1	1	1	1	1	2	2	2	3	3	3	3	3	3	3	3	4	4	4	4	5	5	5	5	5	6	6	6	6	6	6	7	7	8	8	8	8	8	8	8	8	8	8	8	8	8
R45	1	1	1	1	2	2	2	2	3	3	3	3	4+
R46	1	1	+
R47	1	1	1	1	1	1	1	1	1	2	2	2	2	2	3	3	3	3	3	3	4	4	4	4	4	4	4	4	5	+
R48	1	1	1	1	1	1	+
R49	-
R50	-
R51	1	1	1	1	2	2	2	3	3	3	4	4	4	4	5	5	5	5	5	5	5	6	6	6	6	6	6	6	6	7	7	8	8	8	8	8	8	8	8	8	8	8	8	8	8	8	8	9	9
R52	1	1	1	2	2	2	3	3	3	3	4	4	4	4	4	5	5	5	6	6	6	6	6	6	6	6	+
R53	1	1	1	1	1	1	2	2	2	3	3	3	3	4	4	4	5	5	5	5	5	5	5	5	5	5	5	5	6	6	6	6	7	7	7	8	8	8	8	8	8	8	8	8	8	8	8	8	8
R54	1	1	1	1	2	2	2	2	2	2	2	3	3	3	3	3	3	3	3	4	4	4	4	4	4	4	5	5	5	5	5	5	5	5	5	5	+
R55	1	1	1	2+
R56	1	1	+
R57	1	1	1	1	1	1	1	+
R58	1	1	+
R59	1	1	1	1	1	1	1	+
60	1	1	1	1	2	2	2	3	3	3	4	4	4	4	5	5	5	5	5	5	5	6	6	6	6	6	6	6	6	7	7	8	8	8	8	8	8	8	8	8	8	8	8	8	8	8	8	9	9
61	1	1	1	1	+
62	1	1	1	1	1	1	1	2	2	2	2	+
63	1	1	+
64	-
65	1	1	1	1	1	2	2	2	2	2	3	3	3	3	3	3	3	3	3	4	4	4	4	5	5	5	5	5	6	6	6	6	6	6	6	6	6	6	6	6	6	6	6	6	7	7	8	8	8
66	-
67	1	1	1	1	2	2	2	2	2	2	3	3	4	4	4	4	5	5	5	5	5	6	6	6	6	6	6	6	7	8	8	8	8	8	8	8	8	8	8	8	8	8	8	9	9	9	9	9	9
68	1	1	1	1	+
69	1	1	1	2	2	2	3	3	3	3	4	4	4	4	4	5	5	5	6	6	6	6	6	6	6	6	+
70	1	1	1	2	2	2	2	2	2	2	2	+
71	1	1	+
72	1	1	1	1	1	1	1	2	2	3	3	3	4	4	4	4	5	5	5	5	5	6	6	6	6	7	7	8	8	8	8	8	8	8	8	8	8	8	8	8	8	9	9	9	9	9	9	9	9
73	1	1	1	1	1	1	1	1	2	2	2	2	3	3	3	3	4	4	4	5	5	5	6	6	6	6	6	6	6	6	6	6	6	6	6	6	6	6	6	6	6	6	7	7	7	8	8	8	8
74	1	1	1	1	+
75	1	1	1	1	+
76	1	1	1	1	1	1	2	2	2	3	3	3	3	4	4	4	4	4	4	5	5	5	5	6	6	6	6	6	6	6	6	7	7	8	8	8	8	8	8	8	8	8	8	8	8	8	8	9	9
77	1	1	1	1	1	1	+
78	1	1	1	1	1	2	2	2	3	3	3	4	4	4	4	4	5	5	5	6	6	6	6	6	6	7	7	8	8	8	8	8	8	8	8	8	8	8	8	8	8	8	9	9	9	9	9	+
79	1	1	1	1	1	1	1	2	2	2	2	3	3	3	3	3	4	4	4	5	5	5	5	5	5	6	6	6	6	6	6	6	6	6	6	6	6	6	6	6	6	6	6	7	7	8	8	8	8
80	1	1	1	1	+
81	1	1	1	1	+
82	1	1	1	1	1	1	1	1	1	2	2	2	2	2	2	2	3	3	3	3	3	4	4	4	5	5	5	5	6	6	6	6	6	6	6	6	6	7	7	8	8	8	8	8	8	8	8	8	8
83	1	1	1	1	+
84	1	1	+
85	1	1	1	1	1	1	1	1	2	2	2	3	3	3	3	3	4	4	4	4	5	5	5	5	6	6	6	6	6	6	6	6	7	8	8	8	8	8	8	8	8	8	8	8	8	8	8	8	9
86	1	1	1	1	1	1	1	1	1	1	1	1	1	1	2	2	2	2	2	3	3	3	3	3	3	3	4	4	4	4	4	5	5	5	5	5	+
87	1	1	1	1	2	2	2	2	2	3	3	3	4	4	4	4	5	5	5	5	6	6	6	6	+
88	1	1	1	1	1	+
89	1	1	1	1	1	1	1	1	1	1	+
90	1	1	1	1	1	1	2	2	2	2	2	3	3	3	3	3	4	4	4	4	5	5	5	5	6	6	6	6	6	6	6	6	6	6	6	7	8	8	8	8	8	8	8	8	8	8	8	8	8
91	1	1	1	1	1	1	1	1	1	1	1	+
92	1	1	1	2	2	2	2	3	3	3	3	3	+
93	1	1	1	1	+
94	-
95	1	1	1	1	+
96	1	1	1	1	1	1	2	2	2	3	3	3	4	4	4	4	5	5	5	5	5	5	5	6	6	6	6	6	6	6	6	6	6	6	6	6	7	7	8	8	8	8	8	8	8	8	8	8	8
97	1	1	1	2	2	2	2	+
98	1	1	+
99	-
100	1	1	1	1	1	1	1	1	1	1	+
[truncated: 47 more columns]

## Sheet: estat
T1	E. urograndis		T2	S. terebinthifolia
L1	mean	SD	SE		L2	mean	SD	SE		L3	mean	SD	SE		L4	mean	SD	SE		L5	mean	SD	SE		L6	mean	SD	SE		larval period	mean	SD	SE		PP	mean	SD	SE		PUPA	mean	SD	SE		CYCLE	mean	SD	SE
T1	4.9	1.73649	0.173649		T1	4.38462	1.63217	0.163217		T1	4.97297	2.64035	0.264035		T1	5.86486	2.33526	0.233526		T1	4.97143	1.70614	0.170614		T1	11.4286	3.98542	0.398542		T1	35.0714	5.44282	0.544282		T1	2.33333	1.27098	0.127098		T1	15.0417	2.01039	0.201039		T1	52	5.3892	0.53892
4					3					15					12					.					.					.					.					14					.
4					3					4					3					3					10					27					3					10					44
4					3					4					6					5					10					32					2					.					44
.					.					.					.					.					.					.					.					16					.
4					3					3					5					2					7					24					2					.					42
.					.					.					.					.					.					.					.					14					.
5					3					4					8					5					10					35					2					.					51
.					.					.					.					.					.					.					.					.					.
.					.					.					.					.					.					.					.					.					.
.					.					.					.					.					.					.					.					.					.
.					.					.					.					.					.					.					.					.					.
.					.					.					.					.					.					.					.					16					.
4					4					4					3					5					9					29					1					.					46
.					.					.					.					.					.					.					.					.					.
.					.					.					.					.					.					.					.					.					.
.					.					.					.					.					.					.					.					.					.
.					.					.					.					.					.					.					.					.					.
4					4					6					7					9					.					.					.					.					.
.					.					.					.					.					.					.					.					16					.
4					4					7					5					4					11					35					2					.					53
.					.					.					.					.					.					.					.					11					.
4					4					3					8					4					6					29					6					.					46
4					3					5					3					8					10					33					.					15					.
5					3					4					8					5					10					35					2					.					52
.					.					.					.					.					.					.					.					.					.
.					.					.					.					.					.					.					.					.					.
.					.					.					.					.					.					.					.					17					.
4					3					5					5					6					17					40					1					.					58
.					.					.					.					.					.					.					.					14					.
4					3					5					6					5					13					36					3					.					53
.					.					.					.					.					.					.					.					19					.
4					4					4					8					3					6					29					6					16					54
5					5					3					5					4					10					32					1					.					49
.					.					.					.					.					.					.					.					.					.
4					4					4					6					5					.					.					.					.					.
.					.					.					.					.					.					.					.					.					.
5					7					7					11					4					10					43					2					.					.
13					.					.					.					.					.					.					.					.					.
.					.					.					.					.					.					.					.					.					.
.					.					.					.					.					.					.					.					.					.
.					.					.					.					.					.					.					.					.					.
.					.					.					.					.					.					.					.					.					.
.					.					.					.					.					.					.					.					.					.
.					.					.					.					.					.					.					.					.					.
.					.					.					.					.					.					.					.					.					.
.					.					.					.					.					.					.					.					.					.
.					.					.					.					.					.					.					.					.					.
.					.					.					.					.					.					.					.					.					.
.					.					.					.					.					.					.					.					.					.
.					.					.					.					.					.					.					.					14					.
5					5					4					6					4					19					43					1					.					58
.					.					.					.					.					.					.					.					.					.
.					.					.					.					.					.					.					.					.					.
.					.					.					.					.					.					.					.					.					.
4					4					6					6					.					.					.					.					.					.
.					.					.					.					.					.					.					.					.					.
5					8					.					.					.					.					.					.					.					.
.					.					.					.					.					.					.					.					.					.
.					.					.					.					.					.					.					.					.					.
.					.					.					.					.					.					.					.					.					.
.					.					.					.					.					.					.					.					.					.
.					.					.					.					.					.					.					.					.					.
.					.					.					.					.					.					.					.					.					.
8					3					.					.					.					.					.					.					.					.
.					.					.					.					.					.					.					.					.					.
.					.					.					.					.					.					.					.					16					.
4					3					4					9					4					5					29					3					.					48
.					.					.					.					.					.					.					.					.					.
5					4					3					7					3					.					.					.					.					.
.					.					.					.					.					.					.					.					.					.
.					.					.					.					.					.					.					.					.					.
.					.					.					.					.					.					.					.					19					.
4					8					7					5					2					11					36					2					.					57
.					.					.					.					.					.					.					.					.					.
4					8					2					5					5					11					35					4					.					.
4					5					7					3					5					.					.					.					15					.
4					4					4					4					5					11					32					2					.					49
.					.					.					.					.					.					.					.					17					.
5					3					4					3					6					10					31					1					.					49
5					5					12					3					7					.					.					.					.					.
.					.					.					.					.					.					.					.					.					.
.					.					.					.					.					.					.					.					.					.
5					3					3					6					6					.					.					.					15					.
5					6					9					3					4					13					38					3					.					56
.					.					.					.					.					.					.					.					.					.
.					.					.					.					.					.					.					.					15					.
4					4					4					3					5					16					36					2					15					53
5					3					4					8					5					9					34					2					.					51
.					.					.					.					.					.					.					.					.					.
.					.					.					.					.					.					.					.					.					.
.					.					.					.					.					.					.					.					.					.
5					4					3					7					10					.					.					.					.					.
.					.					.					.					.					.					.					.					.					.
.					.					.					.					.					.					.					.					.					.
5					4					4					6					4					16					39					2					14					.
10					3					3					4					7					13					40					2					14					56
5					7					8					10					5					8					41					2					14					57
5					7					3					5					5					20					45					2					15					61
5					7					3					5					5					19					44					2					.					61
.					.					.					.					.					.					.					.					.					.
T2	5.58333	2.11211	0.211211		T2	4	1.43056	0.143056		T2	4.2	1.9242	0.19242		T2	4.21053	1.09441	0.109441		T2	5.35135	2.11103	0.211103		T2	9.21875	4.57718	0.457718		T2	31.5625	5.67358	0.567358		T2	1.875	0.609071	0.0609071		T2	14.375	2.83697	0.283697		T2	48.125	6.04152	0.604152
6					.					.					.					.					.					.					.					15					.
.					.					.					.					.					.					.					.					14					.
.					.					.					.					.					.					.					.					.					.
6					4					3					3					4					16					36					2					.					53
6					3					3					4					5					9					30					1					.					45
9					5					.					.					.					.					.					.					.					.
.					.					.					.					.					.					.					.					16					.
.					.					.					.					.					.					.					.					14					.
.					.					.					.					.					.					.					.					14					.
7					2					3					4					5					7					28					2					1					46
6					3					4					4					6					6					29					2					.					45
6					3					7					4					3					6					29					3					.					46
5					5					2					4					7					15					38					2					16					41
.					.					.					.					.					.					.					.					.					.
.					.					.					.					.					.					.					.					.					.
4					3					3					4					7					8					29					2					.					47
.					.					.					.					.					.					.					.					14					.
.					.					.					.					.					.					.					.					.					.
.					.					.					.					.					.					.					.					.					.
5					4					2					3					5					15					34					2					.					50
.					.					.					.					.					.					.					.					.					.
.					.					.					.					.					.					.					.					.					.
.					.					.					.					.					.					.					.					.					.
4					7					8					3					6					.					.					.					19					.
.					.					.					.					.					.					.					.					.					.
.					.					.					.					.					.					.					.					.					.
7					4					5					3					4					15					38					2					.					59
.					.					.					.					.					.					.					.					.					.
.					.					.					.					.					.					.					.					.					.
.					.					.					.					.					.					.					.					14					.
.					.					.					.					.					.					.					.					.					.
5					6					8					.					.					.					.					.					13					.
5					5					6					4					5					13					38					1					15					53
.					.					.					.					.					.					.					.					.					.
5					3					3					5					6					6					28					1					15					42
4					4					2					4					9					6					29					2					15					46
.					.					.					.					.					.					.					.					14					.
4					4					2					4					9					6					29					2					16					46
6					3					3					5					3					6					26					2					.					43
4					3					3					4					3					10					27					1					14					42
4					3					3					6					5					4					25					3					16					44
.					.					.					.					.					.					.					.					.					.
7					2					3					4					5					4					25					1					.					40
8					3					8					4					5					6					34					2					.					52
4					4					4					.					.					.					.					.					.					.
.					.					.					.					.					.					.					.					.					.
9					5					6					8					.					.					.					.					.					.
.					.					.					.					.					.					.					.					16					.
.					.					.					.					.					.					.					.					.					.
.					.					.					.					.					.					.					.					14					.
4					3					3					4					7					8					29					2					.					47
3					3					4					5					3					.					.					.					.					.
6					3					4					3					12					4					32					3					.					49
4					7					8					7					10					.					.					.					.					.
3					.					.					.					.					.					.					.					.					.
.					.					.					.					.					.					.					.					.					.
.					.					.					.					.					.					.					.					16					.
.					.					.					.					.					.					.					.					.					.
.					.					.					.					.					.					.					.					.					.
4					3					3					4					7					8					29					2					.					47
.					.					.					.					.					.					.					.					.					.
7					.					.					.					.					.					.					.					19					.
.					.					.					.					.					.					.					.					.					.
.					.					.					.					.					.					.					.					14					.
5					5					9					4					5					16					44					2					.					65
.					.					.					.					.					.					.					.					.					.
4					6					2					4					5					.					.					1					.					43
.					.					.					.					.					.					.					.					.					.
3					3					4					5					3					8					26					.					14					.
3					8					.					.					.					.					.					.					13					.
.					.					.					.					.					.					.					.					.					.
7					2					3					4					5					4					25					2					.					41
8					4					4					3					3					20					42					3					14					58
.					.					.					.					.					.					.					.					.					.
.					.					.					.					.					.					.					.					15					.
6					3					4					6					4					8					31					2					15					47
.					.					.					.					.					.					.					.					.					.
5					3					3					5					3					6					25					2					.					42
7					4					5					3					6					18					43					2					13					60
.					.					.					.					.					.					.					.					.					.
.					.					.					.					.					.					.					.					.					.
9					7					5					3					4					9					37					2					15					52
.					.					.					.					.					.					.					.					.					.
.					.					.					.					.					.					.					.					.					.
8					3					5					4					4					.					.					1					.					48
14					4					.					.					.					.					.					.					.					.
4					5					3					4					4					4					24					.					13					.
.					.					.					.					.					.					.					.					.					.
.					.					.					.					.					.					.					.					.					.
6					5					5					4					4					11					35					1					.					49
.					.					.					.					.					.					.					.					.					.
3					4					.					.					.					.					.					.					.					.
.					.					.					.					.					.					.					.					14					.
.					.					.					.					.					.					.					.					.					.
.					.					.					.					.					.					.					.					.					.
6					3					3					4					7					13					36					2					.					52
3					.					.					.					.					.					.					.					.					.
.					.					.					.					.					.					.					.					.					.
.					.					.					.					.					.					.					.					.					.
.					.					.					.					.					.					.					.					.					.
T3	4.90909	0.53936	0.120605		T3	5	2.04939	0.458258		T3	6.27273	2.00454	0.448229		T3	8.1	2.02485	0.452769		T3	8.55556	2.00693	0.448764		T3	13.1111	4.37163	0.977525		T3	45.5556	6.59756	1.47526		T3	2	0	0		T3
5					6					6					5					8					9					39					2
.					.					.					.					.					.					.					.
.					.					.					.					.					.					.					.
5					4					9					8					9					13					48					2
5					8					5					.					.					.					.					.
.					.					.					.					.					.					.					.
5					3					10					8					.					.					.					.
.					.					.					.					.					.					.					.
.					.					.					.					.					.					.					.
.					.					.					.					.					.					.					.
4					6					5					7					7					14					43					2
5					5					5					7					7					12					41					2
.					.					.					.					.					.					.					.
4					4					7					13					13					16					57					2
5					9					4					8					10					10					46					2
5					4					4					9					7					12					41					2
.					.					.					.					.					.					.					.
5					3					8					8					7					9					40					2
6					3					6					8					9					23					55					2
.					.					.					.					.					.					.					.
.					.					.					.					.					.					.					.
.					.					.					.					.					.					.					.
.					.					.					.					.					.					.					.
.					.					.					.					.					.					.					.
.					.					.					.					.					.					.					.
.					.					.					.					.					.					.					.
.					.					.					.					.					.					.					.
.					.					.					.					.					.					.					.
.					.					.					.					.					.					.					.
.					.					.					.					.					.					.					.
.					.					.					.					.					.					.					.
.					.					.					.					.					.					.					.
.					.					.					.					.					.					.					.
.					.					.					.					.					.					.					.
.					.					.					.					.					.					.					.
.					.					.					.					.					.					.					.
.					.					.					.					.					.					.					.
.					.					.					.					.					.					.					.
.					.					.					.					.					.					.					.
.					.					.					.					.					.					.					.
.					.					.					.					.					.					.					.
.					.					.					.					.					.					.					.
.					.					.					.					.					.					.					.
.					.					.					.					.					.					.					.
.					.					.					.					.					.					.					.
.					.					.					.					.					.					.					.
.					.					.					.					.					.					.					.
.					.					.					.					.					.					.					.
.					.					.					.					.					.					.					.
.					.					.					.					.					.					.					.
.					.					.					.					.					.					.					.
.					.					.					.					.					.					.					.
.					.					.					.					.					.					.					.
.					.					.					.					.					.					.					.
.					.					.					.					.					.					.					.
.					.					.					.					.					.					.					.
.					.					.					.					.					.					.					.
.					.					.					.					.					.					.					.
.					.					.					.					.					.					.					.
.					.					.					.					.					.					.					.
.					.					.					.					.					.					.					.
.					.					.					.					.					.					.					.
.					.					.					.					.					.					.					.
.					.					.					.					.					.					.					.
.					.					.					.					.					.					.					.
.					.					.					.					.					.					.					.
.					.					.					.					.					.					.					.
.					.					.					.					.					.					.					.
.					.					.					.					.					.					.					.
.					.					.					.					.					.					.					.
.					.					.					.					.					.					.					.
.					.					.					.					.					.					.					.
.					.					.					.					.					.					.					.
.					.					.					.					.					.					.					.
.					.					.					.					.					.					.					.
.					.					.					.					.					.					.					.
.					.					.					.					.					.					.					.
.					.					.					.					.					.					.					.
.					.					.					.					.					.					.					.
.					.					.					.					.					.					.					.
.					.					.					.					.					.					.					.
.					.					.					.					.					.					.					.
.					.					.					.					.					.					.					.
.					.					.					.					.					.					.					.
.					.					.					.					.					.					.					.
.					.					.					.					.					.					.					.
.					.					.					.					.					.					.					.
.					.					.					.					.					.					.					.
.					.					.					.					.					.					.					.
.					.					.					.					.					.					.					.
.					.					.					.					.					.					.					.
.					.					.					.					.					.					.					.
.					.					.					.					.					.					.					.
.					.					.					.					.					.					.					.
.					.					.					.					.					.					.					.
.					.					.					.					.					.					.					.
.					.					.					.					.					.					.					.
.					.					.					.					.					.					.					.
.					.					.					.					.					.					.					.
.					.					.					.					.					.					.					.

## Sheet: Capsule
Capsules - Eucalyptus	Instars	Largura (mm)			2° instar				3° instar				4° instar				5° instar				6° instar
T1R92	2	0.25		Rep	T1	mean	SD	SE	T1	mean	SD	SE	T1	mean	SD	SE	T1	mean	SD	SE	T1	mean	SD	SE
	3	0.41		1	0.25	0.2875	0.0471141	0.010535	0.41	0.4645	0.0615993	0.013774	0.65	0.748	0.108511	0.0242639	0.96	1.15	0.147826	0.033055	1.43	1.65	0.224523	0.0502048
	4	0.65		2	0.27				0.47				0.86				1.24				1.88
	5	0.96		3	0.46				0.7				1.04				1.5				2
	6	1.43		4	0.28				0.45				0.76				1.19				1.61
T1R3	2	0.27		5	0.26				0.45				0.68				1.14				1.77
	3	0.47		6	0.31				0.45				0.68				1.07				1.57
	4	0.86		7	0.28				0.44				0.77				1.19				1.71
	5	1.24		8	0.32				0.51				0.7				1.01				1.55
	6	1.88		9	0.27				0.46				0.71				0.94				1.7
T1R18	2	0.46		10	0.3				0.47				0.72				1.16				1.34
	3	0.7		11	0.27				0.48				0.88				1.07				1.27
	4	1.04		12	0.28				0.48				0.68				1.18				1.22
	5	1.5		13	0.33				0.43				0.68				1.16				1.65
	6	2		14	0.27				0.42				0.95				1.49				1.84
	7	2.55		15	0.25				0.44				0.75				1.18				1.72
T1R95	2	0.28		16	0.25				0.42				0.7				1.16				2.02
	3	0.45		17	0.27				0.48				0.66				1.1				1.63
	4	0.76		18	0.25				0.48				0.78				1.22				1.84
	5	1.19		19	0.27				0.41				0.6				0.95				1.46
	6	1.61		20	0.31				0.44				0.71				1.09				1.79
T1R99	2	0.26			T2	mean	SD	SE	T2	mean	SD	SE	T2	mean	SD	SE	T2	mean	SD	SE	T2	mean	SD	SE
	3	0.45		1	0.26	0.262	0.00695852	0.00155597	0.46	0.435	0.0278152	0.00621966	0.73	0.711	0.0866268	0.0193704	1.12	1.0715	0.10869	0.0243037	1.69	1.533	0.14459	0.0323313
	4	0.68		2	0.25				0.46				0.8				1.17				1.7
	5	1.14		3	0.26				0.39				0.66				1.01				1.53
	6	1.77		4	0.25				0.42				0.7				0.98				1.58
T1R7	2	0.31		5	0.27				0.43				0.65				1.06				1.45
	3	0.45		6	0.27				0.47				0.75				1.11				1.55
	4	0.68		7	0.26				0.42				0.7				1				1.51
	5	1.07		8	0.26				0.43				0.68				1.06				1.62
	6	1.57		9	0.27				0.45				0.7				1.13				1.63
T1R76	2	0.28		10	0.26				0.45				0.71				0.94				1.24
	3	0.44		11	0.26				0.4				0.93				1.26				1.85
	4	0.77		12	0.27				0.42				0.58				0.94				1.53
	5	1.19		13	0.27				0.4				0.8				1.02				1.52
	6	1.71		14	0.25				0.46				0.78				1.07				1.68
T1R75	2	0.32		15	0.27				0.48				0.8				1.1				1.47
	3	0.51		16	0.27				0.4				0.54				0.86				1.39
	4	0.7		17	0.26				0.45				0.67				1.12				1.56
	5	1.01		18	0.26				0.4				0.64				1.04				1.28
	6	1.55		19	0.26				0.44				0.66				1.11				1.48
T1R79	2	0.27		20	0.26				0.47				0.74				1.33				1.4
	3	0.46
	4	0.71
	5	0.94
	6	1.7

## Sheet: Viability
Treatment	N lives	LARVAL VIABILITY (%)	N PRE-PUPAE	N ADULTS	PUPAL VIABILITY (%)
T1	28	28	27	24	85.7143	96.4286
T2	32	32	32	32	100	100

## Sheet: Consumption
Larva	Date	Day	Initial area	Consumed area	Herbivory rate				Larva	Date	Day	Initial area	Consumed area	Herbivory rate
1	2025-04-06	1	.	.	.				1	2025-04-11	1	18.58	0.18	0.968784
2	2025-04-06	1	0	0	0				1	2025-04-12	2	36.73	0	0
2	2025-04-07	2	38.96	0.06	0.154004				1	2025-04-13	3	18.41	0	0
2	2025-04-08	3	20.75	0.1	0.481928				1	2025-04-14	4	28.12	0	0
2	2025-04-09	4	17.87	0.4	2.23839				1	2025-04-15	5	30.56	0.25	0.818063
2	2025-04-10	5	29.9	0.1	0.334448				1	2025-04-16	6	25.28	0	0
2	2025-04-11	6	29.9	0.1	0.334448		<< E. urophylla		1	2025-04-17	7	36.19	0.27	0.746062
2	2025-04-12	7	29.93	0.538	1.79753				1	2025-04-18	8	33.57	0.18	0.536193
2	2025-04-13	8	19.3	0.45	2.33161				1	2025-04-19	9	25.27	0.01	0.0395726
2	2025-04-14	9	29.52	0.35	1.18564				1	2025-04-20	10	34.18	0.2	0.585138
2	2025-04-15	10	23.82	0.33	1.38539				1	2025-04-21	11	17.8	0.11	0.617978
2	2025-04-16	11	43.93	0.16	0.364216				1	2025-04-22	12	24.93	0.04	0.160449
2	2025-04-17	12	21.14	0.11	0.520341			E. urograndis>>	1	2025-04-23	13	31.3	0	0
2	2025-04-18	13	28.95	0.62	2.14162				2	2025-04-11	1	30.96	0.14	0.452196
2	2025-04-19	14	21.05	0.84	3.9905				2	2025-04-12	2	37.94	0.1	0.263574
2	2025-04-20	15	48.68	1.06	2.17749				2	2025-04-13	3	31.09	0.36	1.15793
2	2025-04-21	16	23.16	0.17	0.734024				2	2025-04-14	4	27.82	0.06	0.215672
2	2025-04-22	17	20.23	0.11	0.543747				2	2025-04-15	5	24.21	0.05	0.206526
2	2025-04-23	18	19.2	0.74	3.85417				2	2025-04-16	6	30.61	0.05	0.163345
2	2025-04-24	19	22.51	1.21	5.37539				2	2025-04-17	7	19.9	0.12	0.603015
2	2025-04-25	20	40.46	1.18	2.91646				2	2025-04-18	8	26.58	0.17	0.639579
2	2025-04-26	21	28.76	1.2	4.17246				2	2025-04-19	9	33.44	0.04	0.119617
2	2025-04-27	22	39.03	2.76	7.07148				2	2025-04-20	10	22.33	0.09	0.403045
2	2025-04-28	23	54.95	1.54	2.80255				2	2025-04-21	11	17.64	0.05	0.283447
2	2025-04-29	24	39.95	0	0				2	2025-04-22	12	40.66	0	0
2	2025-04-30	25	35.16	0.84	2.38908				2	2025-04-23	13	32.32	0.11	0.340347
2	2025-05-01	26	33.17	2.27	6.84353				2	2025-04-24	14	39.87	0.01	0.0250815
2	2025-05-02	27	28.8	1.43	4.96528				2	2025-04-25	15	20.49	0.04	0.195217
2	2025-05-03	28	38.67	4.09	10.5767				2	2025-04-26	16	19.31	0.02	0.103573
2	2025-05-04	29	48.72	6.28	12.89				2	2025-04-27	17	33.49	0.03	0.089579
2	2025-05-05	30	42.29	5.19	12.2724				2	2025-04-28	18	37.76	0	0
2	2025-05-06	31	42.69	7.99	18.7163				2	2025-04-29	19	24.35	0.03	0.123203
2	2025-05-07	32	59.21	6.77	11.4339				3	2025-04-11	1	25.26	0.04	0.158353
2	2025-05-08	33	38.93	0	0				3	2025-04-12	2	18.11	0.05	0.276091
2	2025-05-09	34	22.87	0	0				3	2025-04-13	3	29.57	0.06	0.202908
3	2025-04-06	1	.	.	.				3	2025-04-14	4	30.96	0.04	0.129199
4	2025-04-06	1	39.45	0.19	0.481622				3	2025-04-15	5	29.33	0.04	0.136379
4	2025-04-07	2	22.35	0.2	0.894855				3	2025-04-16	6	30.91	0.24	0.776448
4	2025-04-08	3	28.6	0.16	0.559441				3	2025-04-17	7	35.8	0.2	0.558659
4	2025-04-09	4	30.88	0.36	1.1658				3	2025-04-18	8	25.88	0.23	0.888717
4	2025-04-10	5	23.7	0	0				3	2025-04-19	9	26.16	0.03	0.114679
4	2025-04-11	6	23.67	0	0				3	2025-04-20	10	25.96	0.13	0.50077
4	2025-04-12	7	32.65	0.299	0.915773				3	2025-04-21	11	40.38	0.2	0.495295
4	2025-04-13	8	19.14	0.58	3.0303				3	2025-04-22	12	31.06	0.25	0.804894
4	2025-04-14	9	25.82	0.22	0.852053				3	2025-04-23	13	27.85	0.16	0.574506
4	2025-04-15	10	27.88	0.22	0.789096				3	2025-04-24	14	32.96	0	0
4	2025-04-16	11	24.07	0.21	0.872455				3	2025-04-25	15	37.35	0	0
4	2025-04-17	12	49.72	0.36	0.724055				3	2025-04-26	16	29.56	0.04	0.135318
4	2025-04-18	13	22.12	0	0				3	2025-04-27	17	50.39	0	0
4	2025-04-19	14	25.62	0.14	0.546448				4	2025-04-11	1	22.76	0.23	1.01054
4	2025-04-20	15	28.29	0.05	0.176741				4	2025-04-12	2	36.13	0.14	0.38749
4	2025-04-21	16	60.25	0.35	0.580913				4	2025-04-13	3	29.36	0.14	0.476839
4	2025-04-22	17	32.87	0.44	1.33861				4	2025-04-14	4	34.63	0.2	0.577534
4	2025-04-23	18	40	0.54	1.35				4	2025-04-15	5	21.72	0.3	1.38122
4	2025-04-24	19	32.89	0.6	1.82426				4	2025-04-16	6	28.33	0.26	0.917755
4	2025-04-25	20	52.89	0.52	0.983173				4	2025-04-17	7	38.37	0.31	0.807923
4	2025-04-26	21	46.5	0	0				4	2025-04-18	8	35.63	0.02	0.0561325
4	2025-04-27	22	53.59	0.53	0.98899				4	2025-04-19	9	24.56	0.28	1.14007
4	2025-04-28	23	43.58	1.09	2.50115				4	2025-04-20	10	17.55	0.67	3.81766
4	2025-04-29	24	36.82	0.64	1.73819				4	2025-04-21	11	20.84	0.76	3.64683
4	2025-04-30	25	43.86	0.5	1.13999				4	2025-04-22	12	46.66	0.64	1.37162
4	2025-05-01	26	34.17	0.83	2.42903				4	2025-04-23	13	31.21	3.8	12.1756
4	2025-05-02	27	29.19	0.93	3.18602				4	2025-04-24	14	34.67	0.32	0.922988
4	2025-05-03	28	33.89	1.62	4.78017				4	2025-04-25	15	53.74	0.56	1.04205
4	2025-05-04	29	38.47	0.62	1.61165				4	2025-04-26	16	34.35	0.57	1.65939
4	2025-05-05	30	23.03	0.13	0.564481				4	2025-04-27	17	52.4	1.08	2.06107
4	2025-05-06	31	26.04	1.32	5.06912				4	2025-04-28	18	38.74	1.38	3.56221
4	2025-05-07	32	32.4	3.57	11.0185				4	2025-04-29	19	19.5	0.93	4.76923
4	2025-05-08	33	35.15	3.13	8.90469				4	2025-04-30	20	31.58	1.1	3.48322
4	2025-05-09	34	21.38	6.03	28.2039				4	2025-05-01	21	30.28	1.21	3.99604
4	2025-05-10	35	45.19	1.97	4.35937				4	2025-05-02	22	21.72	0.15	0.690608
4	2025-05-11	36	30.46	1.66	5.44977				4	2025-05-03	23	35.44	0.2	0.564334
4	2025-05-12	37	35.12	2.84	8.08656				4	2025-05-04	24	61.21	2.85	4.6561
4	2025-05-13	38	51.36	2.42	4.71184				4	2025-05-05	25	47.25	2.44	5.16402
4	2025-05-14	39	19.89	2.83	14.2283				4	2025-05-06	26	24.39	3.97	16.2772
4	2025-05-15	40	46.33	3.29	7.10123				4	2025-05-07	27	25.26	6.08	24.0697
4	2025-05-16	41	36.76	0.86	2.3395				4	2025-05-08	28	28.7	5.02	17.4913
4	2025-05-17	42	37.2	3.79	10.1882				4	2025-05-09	29	25.64	3.4	13.2605
4	2025-05-18	43	41.4	1.4	3.38164				4	2025-05-10	30	19.16	2.23	11.6388
4	2025-05-19	44	30.25	0	0				4	2025-05-11	31	32.85	1.86	5.6621
5	2025-04-06	1	0	0	0				4	2025-05-12	32	33.02	1.95	5.90551
5	2025-04-07	2	25.02	0.2	0.799361				4	2025-05-13	33	44.83	6.36	14.1869
5	2025-04-08	3	37.67	0.17	0.451287				4	2025-05-14	34	32.38	11.62	35.8863
5	2025-04-09	4	16.31	0.16	0.980993				4	2025-05-15	35	39	0.19	0.487179
5	2025-04-10	5	26	0	0				5	2025-04-11	1	19.98	0.16	0.800801
5	2025-04-11	6	26	0	0				5	2025-04-12	2	35.92	0.11	0.306236
5	2025-04-12	7	19.02	0	0				5	2025-04-13	3	27.45	0.19	0.692168
5	2025-04-13	8	19.91	0.11	0.552486				5	2025-04-14	4	28.84	0.26	0.901526
5	2025-04-14	9	23.41	0.11	0.469885				5	2025-04-15	5	22.77	0	0
5	2025-04-15	10	25.12	0.11	0.437898				5	2025-04-16	6	36.17	0.03	0.0829417
5	2025-04-16	11	26.22	0.03	0.114416				5	2025-04-17	7	29.31	0.24	0.818833
5	2025-04-17	12	23.24	0.14	0.60241				5	2025-04-18	8	35.47	0.27	0.761207
5	2025-04-18	13	31.79	0	0				5	2025-04-19	9	31.57	0.17	0.538486
5	2025-04-19	14	21.65	0	0				5	2025-04-20	10	37.71	0.15	0.397772
5	2025-04-20	15	10.92	0	0				5	2025-04-21	11	47.47	0.06	0.126396
5	2025-04-21	16	25.56	0.35	1.36933				5	2025-04-22	12	28.23	0.22	0.779313
5	2025-04-22	17	31.44	0.78	2.48092				5	2025-04-23	13	29.68	0.2	0.673854
5	2025-04-23	18	25.78	0.29	1.1249				5	2025-04-24	14	40.86	0.02	0.0489476
5	2025-04-24	19	51.59	0	0				5	2025-04-25	15	21.96	0.04	0.182149
5	2025-04-25	20	22.01	0	0				5	2025-04-26	16	33.26	0.33	0.992183
5	2025-04-26	21	41.11	0	0				5	2025-04-27	17	25.07	0.08	0.319107
5	2025-04-27	22	45.69	0.1	0.218866				5	2025-04-28	18	47.5	0.13	0.273684
5	2025-04-28	23	25.34	0.17	0.670876				5	2025-04-29	19	21	0.14	0.666667
5	2025-04-29	24	40.76	0	0				5	2025-04-30	20	27.02	0.65	2.40563
5	2025-04-30	25	39.25	0	0				5	2025-05-01	21	26.55	0.09	0.338983
5	2025-05-01	26	38.52	0	0				5	2025-05-02	22	24.58	0.21	0.854353
5	2025-05-02	27	30.61	0.16	0.522705				5	2025-05-03	23	32.03	0.83	2.59132
5	2025-05-03	28	29.41	0.09	0.306018				5	2025-05-04	24	45.6	0	0
5	2025-05-04	29	40.32	0.09	0.223214				5	2025-05-05	25	29.25	0.62	2.11966
5	2025-05-05	30	32.08	0.06	0.187032				5	2025-05-06	26	24.59	0.39	1.58601
5	2025-05-06	31	31.75	0.02	0.0629921				5	2025-05-07	27	23.43	3.01	12.8468
5	2025-05-07	32	45	0	0				5	2025-05-08	28	35.46	0.839	2.36605
5	2025-05-08	33	24.02	0.15	0.62448				5	2025-05-09	29	26.54	0.784	2.95403
5	2025-05-09	34	18.95	0.24	1.26649				5	2025-05-10	30	18.83	1.067	5.66649
5	2025-05-10	35	18.2	0.05	0.274725				5	2025-05-11	31	31.47	1.028	3.2666
5	2025-05-11	36	28.84	0.05	0.17337				5	2025-05-12	32	31.54	1.117	3.54153
5	2025-05-12	37	21.78	0.06	0.275482				5	2025-05-13	33	28.78	0.594	2.06393
5	2025-05-13	38	25.06	0	0				5	2025-05-14	34	39.2	2.594	6.61735
6	2025-04-06	1	0	0	0				5	2025-05-15	35	37.41	0.796	2.12777
6	2025-04-07	2	11.07	0.04	0.361337				5	2025-05-16	36	25.7	1.269	4.93774
6	2025-04-08	3	23.87	0.09	0.377042				5	2025-05-17	37	15.73	0	0
6	2025-04-09	4	36.03	0.17	0.471829				5	2025-05-18	38	25.86	1.289	4.98453
6	2025-04-10	5	28.4	0.32	1.12676				5	2025-05-19	39	49.52	1.449	2.92609
6	2025-04-11	6	28.4	0.32	1.12676				5	2025-05-20	40	32.86	0.783	2.38284
6	2025-04-12	7	23.68	0.124	0.523649				5	2025-05-21	41	22.13	2.365	10.6869
6	2025-04-13	8	16.85	0.34	2.0178				5	2025-05-22	42	18.61	1.519	8.16228
6	2025-04-14	9	45.73	0.18	0.393615				5	2025-05-23	43	23.46	1.828	7.79199
6	2025-04-15	10	36.61	0.29	0.792133				5	2025-05-24	44	19.12	1.374	7.18619
6	2025-04-16	11	37.49	0.01	0.0266738				5	2025-05-25	45	19.28	0.458	2.37552
6	2025-04-17	12	38.22	0.24	0.627943				5	2025-05-26	46	20.56	4.659	22.6605
6	2025-04-18	13	54.09	0.22	0.40673				5	2025-05-27	47	45.03	7.762	17.2374
6	2025-04-19	14	18.67	0	0				5	2025-05-28	48	37.17	2.505	6.73931
6	2025-04-20	15	8.67	0.04	0.461361				5	2025-05-29	49	18.19	1.772	9.74162
6	2025-04-21	16	26.76	0.21	0.784753				5	2025-05-30	50	17.88	2.158	12.0694
6	2025-04-22	17	35.67	0.17	0.476591				5	2025-05-31	51	0	0	0
6	2025-04-23	18	38.15	0.25	0.655308				5	2025-06-01	52	23.68	2.541	10.7306
6	2025-04-24	19	28.88	0.16	0.554017				5	2025-06-02	53	30.94	0.679	2.19457
6	2025-04-25	20	34.78	0.22	0.632547				6	2025-04-11	1	26.61	0.21	0.789177
6	2025-04-26	21	18.93	0.07	0.369783				6	2025-04-12	2	26.68	0.19	0.712144
6	2025-04-27	22	48.87	0.22	0.450174				6	2025-04-13	3	43.56	0.2	0.459137
6	2025-04-28	23	52.07	0.23	0.441713				6	2025-04-14	4	31.97	0.21	0.656866
6	2025-04-29	24	27.06	0.04	0.14782				6	2025-04-15	5	34.38	0.14	0.407213
6	2025-04-30	25	30.2	0.04	0.13245				6	2025-04-16	6	22.79	0.31	1.36025
6	2025-05-01	26	40.34	0.04	0.0991572				6	2025-04-17	7	25.1	0	0
6	2025-05-02	27	34.19	0.07	0.204738				6	2025-04-18	8	33.59	0.39	1.16106
6	2025-05-03	28	28.77	0.06	0.208551				6	2025-04-19	9	23.29	0.37	1.58866
6	2025-05-04	29	25.41	0.54	2.12515				6	2025-04-20	10	19.25	0.22	1.14286
6	2025-05-05	30	41.46	0.11	0.265316				6	2025-04-21	11	24.42	0.77	3.15315
6	2025-05-06	31	33.75	0.22	0.651852				6	2025-04-22	12	23.45	0.85	3.62473
6	2025-05-07	32	21.99	0.33	1.50068				6	2025-04-23	13	35.52	0.24	0.675676
6	2025-05-08	33	27.34	0.16	0.585223				6	2025-04-24	14	51.18	0.2	0.390778
6	2025-05-09	34	43	0.13	0.302326				6	2025-04-25	15	62.8	0.15	0.238854
6	2025-05-10	35	23.82	0.48	2.01511				6	2025-04-26	16	29.86	0.71	2.37776
6	2025-05-11	36	29.62	0	0				6	2025-04-27	17	26.1	0.88	3.37165
6	2025-05-12	37	23.85	0	0				6	2025-04-28	18	34.45	1.12	3.25109
6	2025-05-13	38	24.82	0	0				6	2025-04-29	19	38.62	1.28	3.31434
7	2025-04-06	1	44.79	0.21	0.468855				6	2025-04-30	20	22.26	0.7	3.14465
7	2025-04-07	2	31.99	0.26	0.812754				6	2025-05-01	21	34.35	1.12	3.26055
7	2025-04-08	3	25.39	0.3	1.18157				6	2025-05-02	22	18.24	2.081	11.409
7	2025-04-09	4	37.75	0.29	0.768212				6	2025-05-03	23	22.27	1.47	6.60081
7	2025-04-10	5	20.98	0.17	0.810296				6	2025-05-04	24	34.39	0	0
7	2025-04-11	6	20.98	0.17	0.810296				6	2025-05-05	25	38.78	1.58	4.07427
7	2025-04-12	7	40.13	0.232	0.578121				6	2025-05-06	26	31.67	0.69	2.17872
7	2025-04-13	8	20.74	0.26	1.25362				6	2025-05-07	27	33.45	0.66	1.97309
7	2025-04-14	9	19.49	0.24	1.2314				6	2025-05-08	28	27.16	4.56	16.7894
7	2025-04-15	10	35.24	0.11	0.312145				6	2025-05-09	29	33.14	4.52	13.6391
7	2025-04-16	11	50.02	0.08	0.159936				6	2025-05-10	30	27.3	2.63	9.6337
7	2025-04-17	12	53.89	0.26	0.482464				6	2025-05-11	31	33.34	3.05	9.14817
7	2025-04-18	13	54.92	0.26	0.473416				6	2025-05-12	32	33.2	3	9.03614
7	2025-04-19	14	26.48	0.26	0.981873				6	2025-05-13	33	29.55	1.21	4.09475
7	2025-04-20	15	25.11	0.03	0.119474				6	2025-05-14	34	37.61	8.06	21.4305
7	2025-04-21	16	28.37	0.12	0.422982				6	2025-05-15	35	25.9	2.75	10.6178
7	2025-04-22	17	39.68	0.32	0.806452				6	2025-05-16	36	34.22	1.386	4.05026
7	2025-04-23	18	29.44	0.4	1.3587				6	2025-05-17	37	38.1	3.246	8.51969
7	2025-04-24	19	42.9	0.34	0.792541				6	2025-05-18	38	34.63	1.407	4.06295
7	2025-04-25	20	53.83	0.21	0.390117				6	2025-05-19	39	29.71	0.098	0.329855
7	2025-04-26	21	20.81	0.12	0.576646				7	2025-04-11	1	19.66	0.28	1.42421
7	2025-04-27	22	30.98	0.32	1.03292				7	2025-04-12	2	19.09	0.24	1.2572
7	2025-04-28	23	35.45	0.7	1.97461				7	2025-04-13	3	14.68	0.02	0.13624
7	2025-04-29	24	39.78	0	0				7	2025-04-14	4	31.59	0.18	0.569801
7	2025-04-30	25	47.77	0.34	0.711744				7	2025-04-15	5	35.01	0.2	0.571265
7	2025-05-01	26	36.61	0.25	0.682874				7	2025-04-16	6	18.91	0.11	0.581703
7	2025-05-02	27	46.37	0.88	1.89778				7	2025-04-17	7	29.31	0.33	1.1259
7	2025-05-03	28	21.78	0.36	1.65289				7	2025-04-18	8	41.2	0.2	0.485437
7	2025-05-04	29	21.79	0.08	0.367141				7	2025-04-19	9	28.15	0.3	1.06572
7	2025-05-05	30	43.59	0.39	0.894701				7	2025-04-20	10	39.14	0.32	0.817578
7	2025-05-06	31	22.87	0.21	0.918233				7	2025-04-21	11	28.03	0.5	1.7838
7	2025-05-07	32	54.36	0.29	0.533481				7	2025-04-22	12	26.97	0.11	0.407861
7	2025-05-08	33	52.78	0.34	0.644183				7	2025-04-23	13	35.53	0.25	0.703631
7	2025-05-09	34	57.35	0.23	0.401046				7	2025-04-24	14	44.3	0.26	0.586907
7	2025-05-10	35	35.42	0.39	1.10107				7	2025-04-25	15	30.86	0.45	1.4582
7	2025-05-11	36	22.15	0.28	1.26411				7	2025-04-26	16	37.04	0.84	2.26782
7	2025-05-12	37	20.36	0.47	2.30845				7	2025-04-27	17	23.68	0.51	2.15372
7	2025-05-13	38	34.13	0.56	1.64079				7	2025-04-28	18	33.13	1.14	3.44099
7	2025-05-14	39	26.05	0.25	0.959693				7	2025-04-29	19	14.86	1.1	7.40242
7	2025-05-15	40	35.97	0.23	0.639422				7	2025-04-30	20	32.41	0.74	2.28325
7	2025-05-16	41	31.21	0.46	1.47389				7	2025-05-01	21	23.62	0.59	2.49788
8	2025-04-06	1	0	0	0				7	2025-05-02	22	23.74	0.01	0.042123
8	2025-04-07	2	21.75	0	0				7	2025-05-03	23	30.72	0.31	1.00911
8	2025-04-08	3	24.13	0.01	0.0414422				7	2025-05-04	24	31.16	0.56	1.79718
9	2025-04-06	1	53.63	0.01	0.0186463				7	2025-05-05	25	26.96	2.57	9.53264
9	2025-04-07	2	26.36	0.22	0.834598				7	2025-05-06	26	27.21	4.45	16.3543
9	2025-04-08	3	26.7	0.14	0.524345				7	2025-05-07	27	25.67	4.44	17.2965
9	2025-04-09	4	32.26	0.12	0.371978				7	2025-05-08	28	24.87	4.29	17.2497
9	2025-04-10	5	39.5	0.33	0.835443				7	2025-05-09	29	37.22	3.55	9.53788
9	2025-04-11	6	69.57	0.681	0.97887				7	2025-05-10	30	16.97	0.94	5.53919
9	2025-04-12	7	0	0	0				7	2025-05-11	31	46.71	1.59	3.40398
9	2025-04-13	8	34.29	0.78	2.27472				7	2025-05-12	32	46.64	1.7	3.64494
9	2025-04-14	9	41.79	0	0				8	2025-04-11	1	13.46	0.08	0.594354
9	2025-04-15	10	29.02	0.39	1.3439				8	2025-04-12	2	29.94	0.05	0.167001
9	2025-04-16	11	29.87	0.8	2.67827				8	2025-04-13	3	17.19	0.01	0.0581734
9	2025-04-17	12	27.41	0.58	2.11602				8	2025-04-14	4	36.44	0.02	0.0548847
9	2025-04-18	13	41.8	0.32	0.76555				8	2025-04-15	5	35.78	0.29	0.810509
9	2025-04-19	14	29.74	0.37	1.24412				8	2025-04-16	6	30.38	0.15	0.493746
9	2025-04-20	15	36.8	0.53	1.44022				8	2025-04-17	7	30.48	0.2	0.656168
9	2025-04-21	16	64.36	1.12	1.74021				8	2025-04-18	8	32.29	0.22	0.681325
9	2025-04-22	17	41.26	0.26	0.63015				8	2025-04-19	9	24.56	0.36	1.4658
9	2025-04-23	18	44.07	0.37	0.839573				8	2025-04-20	10	24.41	0.09	0.368701
9	2025-04-24	19	32.31	2.06	6.37574				8	2025-04-21	11	14.93	0.25	1.67448
9	2025-04-25	20	65.16	1.38	2.11786				8	2025-04-22	12	24.54	0.13	0.529747
9	2025-04-26	21	26.01	1.19	4.57516				8	2025-04-23	13	31.66	0.07	0.221099
9	2025-04-27	22	40.67	1.11	2.72928				8	2025-04-24	14	47.6	0.09	0.189076
9	2025-04-28	23	51.57	1.41	2.73415				8	2025-04-25	15	35.5	0	0
9	2025-04-29	24	40.66	0.42	1.03296				8	2025-04-26	16	35.74	0.17	0.475658
9	2025-04-30	25	32.95	0	0				8	2025-04-27	17	32.25	0.17	0.527132
9	2025-05-01	26	48.45	0.22	0.454076				8	2025-04-28	18	38.88	0	0
9	2025-05-02	27	35.39	0.66	1.86493				8	2025-04-29	19	35.77	0.12	0.335477
9	2025-05-03	28	49.46	0.61	1.23332				8	2025-04-30	20	21.03	0.2	0.951022
9	2025-05-04	29	30.56	2.25	7.36257				8	2025-05-01	21	45.88	0.11	0.239756
9	2025-05-05	30	45.85	1.28	2.79171				8	2025-05-02	22	21.19	0.23	1.08542
9	2025-05-06	31	40.32	1.13	2.80258				8	2025-05-03	23	22.46	0.39	1.73642
9	2025-05-07	32	51.11	2.57	5.02837				8	2025-05-04	24	20.29	0.19	0.936422
9	2025-05-08	33	59.11	0.8	1.35341				8	2025-05-05	25	22.76	0	0
9	2025-05-09	34	59.56	4.25	7.13566				8	2025-05-06	26	28.83	0.21	0.728408
9	2025-05-10	35	36.06	1.05	2.91181				8	2025-05-07	27	26.94	0.24	0.890869
9	2025-05-11	36	21.52	1.77	8.22491				8	2025-05-08	28	25.8	0.53	2.05426
9	2025-05-12	37	42.58	1.09	2.55989				8	2025-05-09	29	28.34	0.53	1.87015
9	2025-05-13	38	47.92	0.77	1.60684				8	2025-05-10	30	32.67	0.42	1.28558
9	2025-05-14	39	31.72	1.99	6.27364				8	2025-05-11	31	32.16	0.41	1.27488
9	2025-05-15	40	47.11	1.32	2.80195				8	2025-05-12	32	32.32	0.34	1.05198
9	2025-05-16	41	24.17	0.7	2.89615				8	2025-05-13	33	44.57	0.12	0.269239
9	2025-05-17	42	48.48	1.69	3.48597				8	2025-05-14	34	44.32	1.03	2.32401
9	2025-05-18	43	25.49	2.1	8.23852				8	2025-05-15	35	45.62	0.58	1.27137
9	2025-05-19	44	34.24	1.51	4.41005				8	2025-05-16	36	56.79	0.64	1.12696
9	2025-05-20	45	24.74	2.51	10.1455				8	2025-05-17	37	30.78	0.84	2.72904
9	2025-05-21	46	35.36	2.61	7.38122				8	2025-05-18	38	56.91	0.57	1.00158
9	2025-05-22	47	22.13	2.36	10.6643				8	2025-05-19	39	25.11	0.56	2.23019
9	2025-05-23	48	24	0	0				8	2025-05-20	40	20.4	0.27	1.32353
9	2025-05-24	49	12.68	0.05	0.394322				8	2025-05-21	41	21.54	0.74	3.43547
10	2025-04-06	1	42.95	0.09	0.209546				8	2025-05-22	42	33.3	0.94	2.82282
10	2025-04-07	2	18.84	0.05	0.265393				8	2025-05-23	43	18.11	0.75	4.14136
10	2025-04-08	3	47.3	0.12	0.2537				8	2025-05-24	44	24.99	0	0
10	2025-04-09	4	28.01	0.24	0.856837				8	2025-05-25	45	26.35	0.4	1.51803
10	2025-04-10	5	22.21	0.316	1.42278				8	2025-05-26	46	24.16	0.8	3.31126
10	2025-04-11	6	0	0	0				8	2025-05-27	47	25.94	2.75	10.6014
10	2025-04-12	7	33.87	0.057	0.168291				8	2025-05-28	48	67.84	1.48	2.1816
10	2025-04-13	8	26.02	0.14	0.538048				8	2025-05-29	49	38.08	1.59	4.17542
10	2025-04-14	9	25.15	0.09	0.357853				8	2025-05-30	50	20.95	0.11	0.52506
10	2025-04-15	10	21.16	0	0				8	2025-05-31	51	20.1	0.919	4.57214
10	2025-04-16	11	43.02	0	0				8	2025-06-01	52	34.82	0.97	2.78576
10	2025-04-17	12	0	0	0				8	2025-06-02	53	37.53	2.11	5.62217
11	2025-04-06	1	59.23	0.24	0.4052				8	2025-06-03	54	31.7	1.9	5.99369
11	2025-04-07	2	26.66	0.19	0.712678				8	2025-06-04	55	30.34	2.19	7.21819
11	2025-04-08	3	37.72	0.22	0.583245				8	2025-06-05	56	22.28	0.29	1.30162
11	2025-04-09	4	25.17	0.35	1.39054				8	2025-06-06	57	45.27	1.19	2.62867
11	2025-04-10	5	32.39	0.007	0.0216116				8	2025-06-07	58	27.55	1.87	6.78766
11	2025-04-11	6	0	0	0				8	2025-06-08	59	26.9	2.09	7.76952
11	2025-04-12	7	31.94	0.415	1.29931				8	2025-06-09	60	47.01	1.25	2.65901
11	2025-04-13	8	31.42	1.52	4.83768				8	2025-06-10	61	32.14	2.02	6.285
11	2025-04-14	9	41.84	0.72	1.72084				9	2025-04-11	1	27.91	0.26	0.931566
11	2025-04-15	10	24.93	0.03	0.120337				9	2025-04-12	2	33.52	0.08	0.238663
11	2025-04-16	11	24.39	0.21	0.861009				9	2025-04-13	3	27.53	0.32	1.16237
11	2025-04-17	12	28.59	0.16	0.559636				9	2025-04-14	4	21.46	0.01	0.0465983
11	2025-04-18	13	51.88	0.24	0.462606				9	2025-04-15	5	21.73	0.02	0.0920387
11	2025-04-19	14	46.38	0.53	1.14273				9	2025-04-16	6	23.63	0.15	0.634786
11	2025-04-20	15	23.8	0.65	2.73109				9	2025-04-17	7	33.91	0.34	1.00265
11	2025-04-21	16	39.9	0.56	1.40351				9	2025-04-18	8	35.72	0.1	0.279955
11	2025-04-22	17	42.46	0	0				9	2025-04-19	9	32.59	0.49	1.50353
11	2025-04-23	18	49.8	0.49	0.983936				9	2025-04-20	10	27.66	0.24	0.867679
11	2025-04-24	19	39.07	1.47	3.76248				9	2025-04-21	11	12.89	0.14	1.08611
11	2025-04-25	20	60.38	1.31	2.16959				9	2025-04-22	12	32.75	0.02	0.0610687
11	2025-04-26	21	19.64	0.9	4.58248				9	2025-04-23	13	2038	0	0
11	2025-04-27	22	29.96	1.73	5.77437				9	2025-04-24	14	41.49	0	0
11	2025-04-28	23	49.91	1.31	2.62472				9	2025-04-25	15	37.78	0.01	0.026469
11	2025-04-29	24	25.67	0	0				9	2025-04-26	16	52.38	0.35	0.668194
11	2025-04-30	25	37.02	0.61	1.64776				9	2025-04-27	17	35.91	1.41	3.92648
11	2025-05-01	26	40.3	0.42	1.04218				9	2025-04-28	18	54.16	0	0
11	2025-05-02	27	37.31	1.65	4.42241				9	2025-04-29	19	29.55	0.11	0.37225
11	2025-05-03	28	27.07	1.24	4.58072				9	2025-04-30	20	17.77	0.22	1.23804
11	2025-05-04	29	33.63	2.35	6.98781				9	2025-05-01	21	26.55	0.02	0.0753296
11	2025-05-05	30	46.62	1.71	3.66795				9	2025-05-02	22	22.63	0.02	0.0883783
11	2025-05-06	31	43.68	4.16	9.52381				9	2025-05-03	23	36.35	0.55	1.51307
11	2025-05-07	32	35.79	4.49	12.5454				9	2025-05-04	24	33.11	0.14	0.422833
11	2025-05-08	33	59.61	2.16	3.62355				9	2025-05-05	25	25.47	0.07	0.274833
11	2025-05-09	34	44.88	2.7	6.01604				9	2025-05-06	26	32.5	0	0
11	2025-05-10	35	31.79	2.36	7.42372				9	2025-05-07	27	30.34	0	0
11	2025-05-11	36	34.67	8.8	25.3822				9	2025-05-08	28	19.16	0.1	0.521921
11	2025-05-12	37	40.35	3.49	8.64932				9	2025-05-09	29	17.16	0.2	1.1655
11	2025-05-13	38	47.87	2.83	5.91184				9	2025-05-10	30	30.24	0.13	0.429894
11	2025-05-14	39	24.93	0	0				9	2025-05-11	31	29.93	0.11	0.367524
11	2025-05-15	40	43.39	0	0				9	2025-05-12	32	30.04	0.12	0.399467
12	2025-04-06	1	0	0	0				9	2025-05-13	33	30.96	0.085	0.274548
12	2025-04-07	2	32.35	0.07	0.216383				9	2025-05-14	34	27.44	0.984	3.58601
12	2025-04-08	3	23.69	0.11	0.464331				9	2025-05-15	35	20.42	0.144	0.705191
12	2025-04-09	4	28.95	0.36	1.24352				9	2025-05-16	36	33.12	0.106	0.320048
12	2025-04-10	5	30.41	0.253	0.831963				9	2025-05-17	37	24.19	0.141	0.582885
12	2025-04-11	6	0	0	0				9	2025-05-18	38	33.1	0.082	0.247734
12	2025-04-12	7	20.11	0.231	1.14868				9	2025-05-19	39	37.43	0.092	0.245792
12	2025-04-13	8	21.09	0.25	1.1854				9	2025-05-20	40	19.86	0.074	0.372608
12	2025-04-14	9	39.05	0.64	1.63892				9	2025-05-21	41	17.19	0.138	0.802792
12	2025-04-15	10	38	0.57	1.5				9	2025-05-22	42	28.59	0.105	0.367261
12	2025-04-16	11	37.06	0	0				9	2025-05-23	43	24.79	0.236	0.951997
12	2025-04-17	12	58.09	0.66	1.13617				9	2025-05-24	44	12.05	0.175	1.45228
12	2025-04-18	13	47.4	0.54	1.13924				9	2025-05-25	45	21.86	0.208	0.95151
12	2025-04-19	14	42.19	0.62	1.46954				9	2025-05-26	46	18.82	0.069	0.366631
12	2025-04-20	15	34.86	0.33	0.946644				9	2025-05-27	47	19.82	0.11	0.554995
12	2025-04-21	16	26.24	0.43	1.63872				9	2025-05-28	48	57.02	0.292	0.512101
12	2025-04-22	17	18.82	0	0				9	2025-05-29	49	19.7	0	0
12	2025-04-23	18	34.02	0.18	0.529101				9	2025-05-30	50	27.5	0.05	0.181818
12	2025-04-24	19	43.98	0.81	1.84175				9	2025-05-31	51	0	0	0
12	2025-04-25	20	42.09	1.43	3.39748				9	2025-06-01	52	28.06	0.165	0.588026
12	2025-04-26	21	47.85	1.62	3.38558				9	2025-06-02	53	36.2	0.21	0.58011
12	2025-04-27	22	56	2.3	4.10714				9	2025-06-03	54	34.81	0.845	2.42746
12	2025-04-28	23	32.57	1.41	4.32914				9	2025-06-04	55	32.58	0.234	0.718232
12	2025-04-29	24	27.2	0	0				9	2025-06-05	56	19.44	0.06	0.308642
12	2025-04-30	25	49.9	0.17	0.340681				9	2025-06-06	57	35.56	0.175	0.492126
12	2025-05-01	26	34.46	1.1	3.19211				9	2025-06-07	58	19.78	0.125	0.631951
12	2025-05-02	27	40.36	0.12	0.297324				9	2025-06-08	59	31.6	0.251	0.794304
12	2025-05-03	28	42.97	3.21	7.47033				9	2025-06-09	60	26.69	0.16	0.599475
12	2025-05-04	29	31.46	4.95	15.7343				9	2025-06-10	61	52.45	0.491	0.93613
12	2025-05-05	30	39.84	3.27	8.20783				9	2025-06-11	62	45.24	0.523	1.15606
12	2025-05-06	31	28.69	5.02	17.4974				9	2025-06-12	63	35.99	0	0
12	2025-05-07	32	35.3	2.17	6.14731				9	2025-06-13	64	20.4	0.132	0.647059
12	2025-05-08	33	51.58	1.74	3.3734				9	2025-06-14	65	32.79	0.457	1.39372
12	2025-05-09	34	41.98	1.4	3.33492				9	2025-06-15	66	39.3	0.036	0.0916031
12	2025-05-10	35	36.3	2.3	6.33609				9	2025-06-16	67	22.94	0.294	1.2816
12	2025-05-11	36	20.21	0.07	0.346363				9	2025-06-17	68	15.57	0.315	2.02312
12	2025-05-12	37	27.53	0	0				10	2025-04-11	1	33.17	0	0
13	2025-04-06	1	.	.	.				10	2025-04-12	2	29.68	0.03	0.101078
14	2025-04-06	1	54.71	0.06	0.109669				10	2025-04-13	3	24.49	0.07	0.285831
14	2025-04-07	2	25.29	0.28	1.10716				10	2025-04-14	4	32.73	0.05	0.152765
14	2025-04-08	3	26.19	0.25	0.954563				10	2025-04-15	5	33.22	0	0
14	2025-04-09	4	26.03	0.05	0.192086				10	2025-04-16	6	30.47	0.11	0.361011
14	2025-04-10	5	35.95	0.225	0.625869				10	2025-04-17	7	25.32	0.16	0.631912
14	2025-04-11	6	0	0	0				10	2025-04-18	8	34.54	0.28	0.810654
14	2025-04-12	7	26.86	0.163	0.60685				10	2025-04-19	9	22.63	0.27	1.19311
14	2025-04-13	8	39.64	0.23	0.580222				10	2025-04-20	10	33.49	0.18	0.537474
14	2025-04-14	9	54.06	0.41	0.758417				10	2025-04-21	11	27.38	0.06	0.219138
14	2025-04-15	10	45.62	0.09	0.197282				10	2025-04-22	12	31.5	0.09	0.285714
14	2025-04-16	11	32.62	0.05	0.15328				10	2025-04-23	13	37.28	0.07	0.187768
14	2025-04-17	12	42.15	0.24	0.569395				10	2025-04-24	14	36.85	0.03	0.0814111
14	2025-04-18	13	56.5	0.39	0.690265				10	2025-04-25	15	39.01	0.2	0.512689
14	2025-04-19	14	26.99	0.09	0.333457				10	2025-04-26	16	23.57	0.13	0.551549
14	2025-04-20	15	36.06	0.37	1.02607				10	2025-04-27	17	30.16	0.29	0.961538
14	2025-04-21	16	21.73	0.25	1.15048				10	2025-04-28	18	28.98	0.32	1.10421
14	2025-04-22	17	18.47	0.12	0.649702				10	2025-04-29	19	40.33	0.06	0.148773
14	2025-04-23	18	26.29	0.53	2.01598				10	2025-04-30	20	21.02	0.1	0.475737
14	2025-04-24	19	52.49	0.46	0.876357				10	2025-05-01	21	35.68	0.07	0.196188
14	2025-04-25	20	41.4	0.23	0.555556				10	2025-05-02	22	22.27	0.2	0.898069
14	2025-04-26	21	57.57	0.24	0.416884				10	2025-05-03	23	31.18	0	0
14	2025-04-27	22	77.51	0.68	0.877306				10	2025-05-04	24	34.92	0.04	0.114548
14	2025-04-28	23	31.67	0.06	0.189454				10	2025-05-05	25	35.35	0.34	0.96181
14	2025-04-29	24	39.53	0	0				10	2025-05-06	26	85.54	0.06	0.0701426
14	2025-04-30	25	51.35	0.06	0.116845				10	2025-05-07	27	29.54	0.04	0.13541
14	2025-05-01	26	34.39	0.17	0.49433				10	2025-05-08	28	18.86	0.13	0.68929
14	2025-05-02	27	35.22	2.11	5.99091				10	2025-05-09	29	51.66	0.5	0.967867
14	2025-05-03	28	42.79	0.39	0.911428				10	2025-05-10	30	35.77	0.29	0.810735
14	2025-05-04	29	30.93	1.99	6.43388				10	2025-05-11	31	30.04	0.28	0.932091
14	2025-05-05	30	37.88	0.02	0.0527983				10	2025-05-12	32	29.96	0.23	0.76769
14	2025-05-06	31	29.22	0.58	1.98494				10	2025-05-13	33	21.98	0.32	1.45587
14	2025-05-07	32	48.34	0.57	1.17915				10	2025-05-14	34	40.23	0.46	1.14343
14	2025-05-08	33	50.17	0.79	1.57465				10	2025-05-15	35	29.14	0.14	0.480439
14	2025-05-09	34	35.45	0.47	1.32581				10	2025-05-16	36	47.27	0.42	0.888513
14	2025-05-10	35	31.65	0.49	1.54818				10	2025-05-17	37	22.2	0.04	0.18018
14	2025-05-11	36	24.66	0.11	0.446067				10	2025-05-18	38	46.71	0.36	0.770713
14	2025-05-12	37	41.16	0.35	0.85034				10	2025-05-19	39	18.57	0.06	0.323102
14	2025-05-13	38	41.15	0.31	0.753341				10	2025-05-20	40	29.27	0.51	1.7424
14	2025-05-14	39	17.94	1.75	9.75474				10	2025-05-21	41	17.3	0.22	1.27168
14	2025-05-15	40	37.15	0.39	1.0498				10	2025-05-22	42	19.89	1.06	5.32931
14	2025-05-16	41	53.03	0.33	0.622289				10	2025-05-23	43	41.07	1.11	2.7027
14	2025-05-17	42	38.52	1.06	2.75182				10	2025-05-24	44	18.86	0.06	0.318134
14	2025-05-18	43	34.28	0.36	1.05018				10	2025-05-25	45	22.22	0.85	3.82538
14	2025-05-19	44	28.9	0.32	1.10727				10	2025-05-26	46	16.33	0.02	0.122474
14	2025-05-20	45	33.67	0.59	1.7523				10	2025-05-27	47	13.73	0.67	4.87983
14	2025-05-21	46	30.73	0.37	1.20404				10	2025-05-28	48	42.33	0.51	1.20482
14	2025-05-22	47	40.49	0.7	1.72882				10	2025-05-29	49	18.2	0	0
14	2025-05-23	48	26.09	0.67	2.56803				10	2025-05-30	50	27.51	0.19	0.690658
14	2025-05-24	49	16.93	1.67	9.86415				10	2025-05-31	51	0	0	0
14	2025-05-25	50	22.74	9.17	40.3254				10	2025-06-01	52	27.31	0.67	2.45331
14	2025-05-26	51	20.67	0	0				10	2025-06-02	53	29.9	1.24	4.14716
14	2025-05-27	52	14.75	0	0				10	2025-06-03	54	32.8	0.96	2.92683
14	2025-05-28	53	14.22	0.11	0.773558				10	2025-06-04	55	18.94	1.94	10.2429
14	2025-05-29	54	36.04	0.73	2.02553				10	2025-06-05	56	16.5	0.03	0.181818
14	2025-05-30	55	22.95	1.13	4.92375				10	2025-06-06	57	41.62	0.69	1.65786
14	2025-05-31	56	54.23	1.02	1.88088				10	2025-06-07	58	14.97	1.14	7.61523
14	2025-06-01	57	19.33	0.74	3.82825				10	2025-06-08	59	25.68	1.5	5.84112
14	2025-06-02	58	26.79	0.92	3.43412				10	2025-06-09	60	34.58	1.47	4.25101
14	2025-06-03	59	18.95	2.49	13.1398				10	2025-06-10	61	38.44	3.93	10.2237
14	2025-06-04	60	17.95	2.07	11.532				10	2025-06-11	62	21.06	1.74	8.26211
14	2025-06-05	61	17.92	2.02	11.2723				10	2025-06-12	63	17.91	3.25	18.1463
14	2025-06-06	62	22.46	2.2	9.79519				10	2025-06-13	64	16.01	1.7	10.6184
14	2025-06-07	63	36.22	0	0				10	2025-06-14	65	34.74	2.15	6.18883
14	2025-06-08	64	28.39	1.96	6.90384				10	2025-06-15	66	43.58	1.17	2.68472
14	2025-06-09	65	40.87	2.72	6.65525				10	2025-06-16	67	35.05	0.55	1.56919
14	2025-06-10	66	33.55	0.99	2.95082				11	2025-04-11	1	32.42	0.23	0.709439
14	2025-06-11	67	11.97	0.63	5.26316				11	2025-04-12	2	45.23	0.15	0.331638
14	2025-06-12	68	56.29	7.55	13.4127				11	2025-04-13	3	33.1	0.22	0.664653
14	2025-06-13	69	25.21	1.03	4.08568				11	2025-04-14	4	21.64	0.09	0.415896
14	2025-06-14	70	28.12	0.44	1.56472				11	2025-04-15	5	24.08	0.02	0.0830565
14	2025-06-15	71	53	1.11	2.09434				11	2025-04-16	6	45.1	0.16	0.354767
14	2025-06-16	72	52.17	0.09	0.172513				11	2025-04-17	7	40.04	0.36	0.899101
14	2025-06-17	73	28.56	0	0				11	2025-04-18	8	28.35	0.35	1.23457
15	2025-04-08	1	21.82	0.03	0.137489				11	2025-04-19	9	30.57	0.28	0.915931
15	2025-04-09	2	29.42	0.03	0.101971				11	2025-04-20	10	38.09	0.66	1.73274
15	2025-04-10	3	44.24	0.081	0.183092				11	2025-04-21	11	32.52	0.23	0.707257
15	2025-04-11	4	0	0	0				11	2025-04-22	12	42.8	0.73	1.70561
15	2025-04-12	5	70.71	0.062	0.0876821				11	2025-04-23	13	35.7	0.34	0.952381
15	2025-04-13	6	22.49	0	0				11	2025-04-24	14	58.46	0	0
15	2025-04-14	7	28.28	0.07	0.247525				11	2025-04-25	15	44.79	0.3	0.669792
15	2025-04-15	8	26.82	0.14	0.521999				11	2025-04-26	16	25.79	0.6	2.32648
15	2025-04-16	9	30.36	0.08	0.263505				11	2025-04-27	17	34.93	0.54	1.54595
15	2025-04-17	10	45.26	0.01	0.0220946				11	2025-04-28	18	38.12	0.6	1.57398
15	2025-04-18	11	20.8	0.12	0.576923				11	2025-04-29	19	39.29	0.58	1.4762
15	2025-04-19	12	29.64	0.3	1.01215				11	2025-04-30	20	36.72	0.24	0.653595
15	2025-04-20	13	27.87	0.4	1.43524				11	2025-05-01	21	34.26	0.58	1.69294
15	2025-04-21	14	18.17	0.4	2.20143				11	2025-05-02	22	18.73	0.33	1.76188
15	2025-04-22	15	42.2	0	0				11	2025-05-03	23	25.13	0.98	3.89972
15	2025-04-23	16	27.1	0.19	0.701107				11	2025-05-04	24	41.52	1.11	2.67341
15	2025-04-24	17	43.32	0.13	0.300092				11	2025-05-05	25	39.2	1.14	2.90816
15	2025-04-25	18	49.18	0.46	0.93534				11	2025-05-06	26	24.75	0.94	3.79798
15	2025-04-26	19	63.42	0.28	0.441501				11	2025-05-07	27	23.23	0.93	4.00344
15	2025-04-27	20	64.14	0.58	0.904272				11	2025-05-08	28	31.68	0	0
15	2025-04-28	21	51.35	0	0				11	2025-05-09	29	41.77	0.97	2.32224
15	2025-04-29	22	29.23	0.17	0.581594				11	2025-05-10	30	19.72	1.66	8.41785
15	2025-04-30	23	38.24	0.28	0.732218				11	2025-05-11	31	42.97	2.32	5.39912
15	2025-05-01	24	38.63	0.6	1.5532				11	2025-05-12	32	43.93	2.49	5.66811
15	2025-05-02	25	36.03	0.83	2.30364				11	2025-05-13	33	48.73	1.21	2.48307
15	2025-05-03	26	44.77	0.59	1.31785				11	2025-05-14	34	44.81	4.77	10.6449
15	2025-05-04	27	27.88	1.05	3.76614				11	2025-05-15	35	15.22	1.51	9.92116
15	2025-05-05	28	34.22	0.79	2.30859				11	2025-05-16	36	31.46	1.28	4.06866
15	2025-05-06	29	26.96	0.29	1.07567				11	2025-05-17	37	39.71	1.75	4.40695
15	2025-05-07	30	32.11	1.33	4.14201				11	2025-05-18	38	31.89	1.79	5.61304
15	2025-05-08	31	30.52	0.79	2.58847				11	2025-05-19	39	35.54	2.67	7.51266
15	2025-05-09	32	53.34	0	0				11	2025-05-20	40	36.81	2.24	6.0853
15	2025-05-10	33	38.36	0.3	0.782065				11	2025-05-21	41	20.79	2.41	11.5921
15	2025-05-11	34	20.35	2.82	13.8575				11	2025-05-22	42	24.32	0.02	0.0822368
15	2025-05-12	35	41.27	0.84	2.03538				12	2025-04-11	1	25.21	0.17	0.674336
15	2025-05-13	36	49.39	0.91	1.84248				12	2025-04-12	2	47.99	0.08	0.166701
15	2025-05-14	37	24.69	0.94	3.80721				12	2025-04-13	3	21.21	0.19	0.895804
15	2025-05-15	38	44.35	0.84	1.89402				12	2025-04-14	4	20.21	0.21	1.03909
15	2025-05-16	39	39.24	1	2.54842				12	2025-04-15	5	24.38	0.06	0.246103
15	2025-05-17	40	65.06	1.22	1.87519				12	2025-04-16	6	27.72	0	0
15	2025-05-18	41	34.9	0	0				12	2025-04-17	7	32.51	0.16	0.492156
15	2025-05-19	42	31.22	0	0				12	2025-04-18	8	35.96	0.31	0.862069
15	2025-05-20	43	35.15	0.82	2.33286				12	2025-04-19	9	34.81	0.33	0.948003
15	2025-05-21	44	34.65	2.46	7.09957				12	2025-04-20	10	35.75	0.28	0.783217
15	2025-05-22	45	35.06	3.31	9.44096				12	2025-04-21	11	42.25	0.41	0.970414
15	2025-05-23	46	19.7	1.8	9.13706				12	2025-04-22	12	35.82	0.49	1.36795
15	2025-05-24	47	17.38	6.73	38.7227				12	2025-04-23	13	52.05	0	0
15	2025-05-25	48	19.45	7.92	40.7198				12	2025-04-24	14	34.68	0.16	0.461361
15	2025-05-26	49	16.57	2.67	16.1135				12	2025-04-25	15	26.5	0.38	1.43396
15	2025-05-27	50	14.16	0.7	4.9435				12	2025-04-26	16	23.3	0.85	3.64807
15	2025-05-28	51	12.68	0.26	2.05047				12	2025-04-27	17	33.82	0.72	2.12892
15	2025-05-29	52	31.45	3.91	12.4324				12	2025-04-28	18	50.49	0.87	1.72311
15	2025-05-30	53	39.47	1.11	2.81226				12	2025-04-29	19	35.23	0.69	1.95856
15	2025-05-31	54	23.97	1.88	7.84314				12	2025-04-30	20	19.17	0.66	3.44288
15	2025-06-01	55	26.7	0.8	2.99625				12	2025-05-01	21	53.28	1.04	1.95195
16	2025-04-06	1	50.29	0.09	0.178962				12	2025-05-02	22	18.37	0.62	3.37507
16	2025-04-07	2	26.16	0.28	1.07034				12	2025-05-03	23	35.97	1.33	3.69753
16	2025-04-08	3	18.77	0.11	0.586042				12	2025-05-04	24	45.09	0	0
16	2025-04-09	4	33.79	0.37	1.095				12	2025-05-05	25	26.66	0.54	2.02551
16	2025-04-10	5	23.28	0.392	1.68385				12	2025-05-06	26	31.12	1.5	4.82005
16	2025-04-11	6	0	0	0				12	2025-05-07	27	29.17	1.48	5.07371
16	2025-04-12	7	18.39	0.275	1.49538				12	2025-05-08	28	30.59	1.59	5.19778
16	2025-04-13	8	20.47	0.18	0.879336				12	2025-05-09	29	26.55	2.08	7.83427
16	2025-04-14	9	41.75	0.44	1.05389				12	2025-05-10	30	36.93	2.55	6.90496
16	2025-04-15	10	24.05	0.52	2.16216				12	2025-05-11	31	24.79	1.58	6.37354
16	2025-04-16	11	28.57	0.27	0.945047				12	2025-05-12	32	24.84	1.49	5.99839
16	2025-04-17	12	15	1.3	8.66667				12	2025-05-13	33	23.41	2.19	9.35498
16	2025-04-18	13	56.06	0.82	1.46272				12	2025-05-14	34	54.26	8.07	14.8728
16	2025-04-19	14	28.81	0.19	0.659493				12	2025-05-15	35	41.64	3.17	7.61287
16	2025-04-20	15	42.85	1.33	3.10385				12	2025-05-16	36	31.48	1.77	5.62262
16	2025-04-21	16	39.79	0.17	0.427243				12	2025-05-17	37	38.34	1.36	3.54721
16	2025-04-22	17	37.48	0.27	0.720384				12	2025-05-18	38	31.82	1.79	5.62539
16	2025-04-23	18	41.06	0.54	1.31515				12	2025-05-19	39	22.49	0.05	0.222321
16	2025-04-24	19	17.42	1.6	9.18485				12	2025-05-20	40	36.75	0.18	0.489796
16	2025-04-25	20	49.64	1.13	2.27639				13	2025-04-11	1	17.41	0.2	1.14877
16	2025-04-26	21	33.68	0.44	1.30641				13	2025-04-12	2	41.13	0.19	0.46195
16	2025-04-27	22	77.36	1.42	1.83557				13	2025-04-13	3	33.06	0.27	0.816697
16	2025-04-28	23	46.37	1.9	4.09748				13	2025-04-14	4	39.23	0.25	0.637267
16	2025-04-29	24	41.74	0	0				13	2025-04-15	5	32.68	0	0
16	2025-04-30	25	48.14	0.45	0.934774				13	2025-04-16	6	31.17	0.14	0.44915
16	2025-05-01	26	39.16	1.74	4.44331				13	2025-04-17	7	27.2	0.39	1.43382
16	2025-05-02	27	37.54	1.85	4.92808				13	2025-04-18	8	51.04	0.04	0.0783699
16	2025-05-03	28	34.47	2.36	6.84653				13	2025-04-19	9	28.05	0.49	1.74688
16	2025-05-04	29	44.4	3.02	6.8018				13	2025-04-20	10	25.83	0.38	1.47116
16	2025-05-05	30	43.65	3.5	8.01833				13	2025-04-21	11	31.77	0.24	0.75543
16	2025-05-06	31	42.11	2.86	6.79174				13	2025-04-22	12	22.63	0.05	0.220946
16	2025-05-07	32	25.91	5.17	19.9537				13	2025-04-23	13	23.33	0.23	0.985855
16	2025-05-08	33	36.58	4.17	11.3997				13	2025-04-24	14	47.14	0.33	0.700042
16	2025-05-09	34	46.12	2.44	5.29055				13	2025-04-25	15	46.11	0.55	1.1928
16	2025-05-10	35	21.12	0.02	0.094697				13	2025-04-26	16	36.88	0.73	1.97939
16	2025-05-11	36	19.16	0	0				13	2025-04-27	17	40.52	0.81	1.99901
17	2025-04-06	1	39.89	0.1	0.250689				13	2025-04-28	18	32.43	1.06	3.26858
17	2025-04-07	2	29.11	0.23	0.790106				13	2025-04-29	19	37.17	0.871	2.34329
17	2025-04-08	3	29.9	0.17	0.568562				13	2025-04-30	20	28.51	0.745	2.61312
17	2025-04-09	4	22.15	0.06	0.27088				13	2025-05-01	21	32.84	1.478	4.50061
17	2025-04-10	5	33.9	0.089	0.262537				13	2025-05-02	22	21.85	0.666	3.04805
17	2025-04-11	6	0	0	0				13	2025-05-03	23	25.08	0	0
17	2025-04-12	7	61.78	0.238	0.385238				13	2025-05-04	24	39.25	0.817	2.08153
17	2025-04-13	8	19.23	0	0				13	2025-05-05	25	48.11	1.91	3.97007
17	2025-04-14	9	43.92	0.01	0.0227687				13	2025-05-06	26	25.69	1.268	4.93577
17	2025-04-15	10	32.82	0	0				13	2025-05-07	27	24.17	3.227	13.3513
17	2025-04-16	11	43.34	0	0				13	2025-05-08	28	33.24	3.104	9.33815
18	2025-04-06	1	37.89	0.3	0.791766				13	2025-05-09	29	35.76	3.289	9.19743
18	2025-04-07	2	23.7	0.12	0.506329				13	2025-05-10	30	34.22	2.035	5.94681
18	2025-04-08	3	18.41	0.13	0.706138				13	2025-05-11	31	22.58	4.224	18.7068
18	2025-04-09	4	26.28	0.04	0.152207				13	2025-05-12	32	23.09	4.485	19.424
18	2025-04-10	5	27.08	0.194	0.716396				13	2025-05-13	33	33.57	2.922	8.7042
18	2025-04-11	6	0	0	0				13	2025-05-14	34	34.45	3.73	10.8273
18	2025-04-12	7	20.16	0.125	0.62004				13	2025-05-15	35	21.81	2.931	13.4388
18	2025-04-13	8	20.96	0.39	1.86069				13	2025-05-16	36	32.08	0.86	2.6808
18	2025-04-14	9	36.96	0.56	1.51515				13	2025-05-17	37	29.47	1.519	5.15439
18	2025-04-15	10	44.22	0.39	0.881954				13	2025-05-18	38	32.81	0.739	2.25236
18	2025-04-16	11	44.81	0.3	0.669493				14	2025-04-11	1	.	.	.
18	2025-04-17	12	31.88	0.09	0.282309				15	2025-04-11	1	17.67	0	0
18	2025-04-18	13	47.11	0.31	0.658034				15	2025-04-12	2	22.7	0.09	0.396476
18	2025-04-19	14	23.45	0.22	0.938166				15	2025-04-13	3	32.53	0.01	0.0307409
18	2025-04-20	15	18.35	0.47	2.56131				15	2025-04-14	4	36.09	0.14	0.387919
18	2025-04-21	16	27.15	0.59	2.17311				15	2025-04-15	5	25.57	0.01	0.0391083
18	2025-04-22	17	39.99	0.87	2.17554				15	2025-04-16	6	22.09	0	0
18	2025-04-23	18	34.7	0.71	2.04611				15	2025-04-17	7	34.71	0.39	1.1236
18	2025-04-24	19	48.39	0.23	0.475305				15	2025-04-18	8	39.98	0.18	0.450225
18	2025-04-25	20	60.53	0.57	0.941682				15	2025-04-19	9	34.64	0.36	1.03926
18	2025-04-26	21	27.55	0.77	2.79492				15	2025-04-20	10	23.07	0.48	2.08062
18	2025-04-27	22	70.27	1.37	1.94962				15	2025-04-21	11	31.09	0	0
18	2025-04-28	23	48.94	0.73	1.49162				15	2025-04-22	12	36.51	0.12	0.328677
18	2025-04-29	24	25.79	0.88	3.41218				15	2025-04-23	13	43.03	0.23	0.534511
18	2025-04-30	25	49.84	1.52	3.04976				15	2025-04-24	14	25.53	0.11	0.430866
18	2025-05-01	26	34.42	0	0				15	2025-04-25	15	21.6	0.46	2.12963
18	2025-05-02	27	36.09	1.52	4.21169				15	2025-04-26	16	24.75	0.37	1.49495
18	2025-05-03	28	39.79	2.55	6.40865				15	2025-04-27	17	21.39	0.05	0.233754
18	2025-05-04	29	26.38	4.18	15.8453				15	2025-04-28	18	28.58	0.11	0.384885
18	2025-05-05	30	47.76	5.56	11.6415				15	2025-04-29	19	45.27	0.16	0.353435
18	2025-05-06	31	29.56	6.2	20.9743				15	2025-04-30	20	19.7	0.09	0.456853
18	2025-05-07	32	26.45	13.25	50.0945				15	2025-05-01	21	37.25	0.03	0.0805369
18	2025-05-08	33	55.49	4.33	7.80321				15	2025-05-02	22	21.83	0.08	0.366468
18	2025-05-09	34	49.27	0.43	0.872742				15	2025-05-03	23	25.14	0.3	1.19332
18	2025-05-10	35	28.23	0.54	1.91286				15	2025-05-04	24	33.94	0	0
18	2025-05-11	36	22.08	0	0				15	2025-05-05	25	26.15	0.33	1.26195
19	2025-04-06	1	.	.	.				15	2025-05-06	26	16.54	0	0
20	2025-04-06	1	.	.	.				15	2025-05-07	27	15.74	0	0
									15	2025-05-08	28	35.61	0.04	0.112328
									15	2025-05-09	29	29.41	0.15	0.510031
									15	2025-05-10	30	27.96	0.13	0.46495
									15	2025-05-11	31	35.97	0.3	0.834028
									15	2025-05-12	32	37.09	0.14	0.37746
									15	2025-05-13	33	16.01	0.08	0.499688
									15	2025-05-14	34	29.18	0.09	0.30843
									15	2025-05-15	35	25.94	0	0
									15	2025-05-16	36	39.72	0.19	0.478348
									15	2025-05-17	37	15.9	0.08	0.503145
									15	2025-05-18	38	37.69	0.187	0.496153
									15	2025-05-19	39	25.31	0.097	0.383248
									15	2025-05-20	40	22.67	0.243	1.0719
									15	2025-05-21	41	17.17	0.117	0.681421
									15	2025-05-22	42	29.97	0.188	0.627294
									15	2025-05-23	43	22.32	0.235	1.05287
									15	2025-05-24	44	29.72	0.148	0.497981
									15	2025-05-25	45	20.02	0.38	1.8981
									15	2025-05-26	46	33.16	0.26	0.784077
									15	2025-05-27	47	28.85	0.269	0.932409
									15	2025-05-28	48	26.58	0.374	1.40707
									15	2025-05-29	49	17.8	0.427	2.39888
									15	2025-05-30	50	22.11	0.135	0.610583
									15	2025-05-31	51	0	0	0
									15	2025-06-01	52	31.29	0	0
									15	2025-06-02	53	37.99	0.109	0.286918
									15	2025-06-03	54	28.21	1.152	4.08366
									15	2025-06-04	55	34.78	0.291	0.836688
									15	2025-06-05	56	35.16	1.734	4.93174
									15	2025-06-06	57	34.77	0.084	0.241588
									15	2025-06-07	58	27.1	0.234	0.863469
									15	2025-06-08	59	42.55	0.6	1.41011
									15	2025-06-09	60	23.71	0.034	0.143399
									15	2025-06-10	61	41.34	0.071	0.171746
									16	2025-04-11	1	22.99	0.3	1.30492
									16	2025-04-12	2	38.78	0.27	0.696235
									16	2025-04-13	3	33.39	0.26	0.778676
									16	2025-04-14	4	43.37	0.03	0.0691722
									16	2025-04-15	5	18.87	0.17	0.900901
									16	2025-04-16	6	30.26	0.16	0.528751
									16	2025-04-17	7	21.22	0.07	0.329877
									16	2025-04-18	8	23.48	0.08	0.340716
									16	2025-04-19	9	16.61	0	0
									16	2025-04-20	10	33.99	0.1	0.294204
									16	2025-04-21	11	41.51	0	0
									16	2025-04-22	12	29.8	0.09	0.302013
									16	2025-04-23	13	42.85	0.04	0.0933489
									16	2025-04-24	14	41.73	0	0
									16	2025-04-25	15	44.71	0.25	0.559159
									16	2025-04-26	16	27.25	0.16	0.587156
									16	2025-04-27	17	44.24	0.05	0.11302
									16	2025-04-28	18	46.23	0.04	0.0865239
									16	2025-04-29	19	23.08	0.07	0.303293
									16	2025-04-30	20	10.79	0.04	0.370714
									16	2025-05-01	21	31.88	0	0
									16	2025-05-02	22	20.54	0.08	0.389484
									17	2025-04-11	1	41.85	0.36	0.860215
									17	2025-04-12	2	57.51	0.37	0.643366
									17	2025-04-13	3	34.49	0.32	0.927805
									17	2025-04-14	4	46.96	0.1	0.212947
									17	2025-04-15	5	43.29	0.05	0.1155
									17	2025-04-16	6	31.3	0.46	1.46965
									17	2025-04-17	7	35.66	0.73	2.04711
									17	2025-04-18	8	47.02	0.5	1.06338
									17	2025-04-19	9	45.15	0.09	0.199336
									17	2025-04-20	10	47.19	0.08	0.169527
									17	2025-04-21	11	31.39	0.33	1.05129
									17	2025-04-22	12	39.83	0.88	2.20939
									17	2025-04-23	13	25.66	1.12	4.36477
									17	2025-04-24	14	38.12	1.16	3.04302
									17	2025-04-25	15	39.22	0.16	0.407955
									17	2025-04-26	16	35.12	1.28	3.64465
									17	2025-04-27	17	34.6	0.9	2.60116
									17	2025-04-28	18	54.38	1.12	2.05958
									17	2025-04-29	19	41.31	1	2.42072
									17	2025-04-30	20	27.43	0.08	0.291651
									17	2025-05-01	21	51.66	0.31	0.600077
									17	2025-05-02	22	28.32	0.87	3.07203
									17	2025-05-03	23	39.67	1.71	4.31056
									17	2025-05-04	24	37.07	0.53	1.42973
									17	2025-05-05	25	35.43	1.28	3.61276
									17	2025-05-06	26	35.26	1.41	3.99887
									17	2025-05-07	27	33.03	1.42	4.29912
									17	2025-05-08	28	31.21	1.59	5.09452
									17	2025-05-09	29	40.55	1.4	3.45253
									17	2025-05-10	30	44.4	1.62	3.64865
									17	2025-05-11	31	24.84	1.13	4.54911
									17	2025-05-12	32	24.83	1.08	4.34958
									17	2025-05-13	33	38.58	1.54	3.99171
									17	2025-05-14	34	28.96	2.13	7.35497
									17	2025-05-15	35	45.62	1.48	3.24419
									17	2025-05-16	36	30.84	2.59	8.39818
									17	2025-05-17	37	37.18	1.646	4.42711
									17	2025-05-18	38	30.93	2.622	8.47721
									17	2025-05-19	39	26.34	1.563	5.93394
									17	2025-05-20	40	40.03	1.95	4.87135
									17	2025-05-21	41	34.62	2.06	5.95032
									17	2025-05-22	42	28.84	2.151	7.45839
									18	2025-04-11	1	34.97	0.04	0.114384
									18	2025-04-12	2	34.61	0.21	0.606761
									18	2025-04-13	3	26.86	0.3	1.1169
									18	2025-04-14	4	22.16	0.44	1.98556
									18	2025-04-15	5	32.73	0.57	1.74152
									18	2025-04-16	6	41.83	0.39	0.932345
									18	2025-04-17	7	29.91	0	0
									18	2025-04-18	8	32.11	0.31	0.965431
									18	2025-04-19	9	19.91	0.28	1.40633
									18	2025-04-20	10	30.15	0.44	1.45937
									18	2025-04-21	11	46.65	0.15	0.321543
									18	2025-04-22	12	27.34	0.25	0.914411
									18	2025-04-23	13	30.26	0.29	0.958361
									18	2025-04-24	14	50.54	0.29	0.573803
									18	2025-04-25	15	58.01	0.65	1.1205
									18	2025-04-26	16	34.73	0.49	1.41088
									18	2025-04-27	17	31.97	0.57	1.78292
									18	2025-04-28	18	38.96	0.79	2.02772
									18	2025-04-29	19	51.86	0.55	1.06055
									18	2025-04-30	20	33.46	0.3	0.896593
									18	2025-05-01	21	51.87	0.76	1.4652
									18	2025-05-02	22	24.15	2.02	8.36439
									18	2025-05-03	23	46.76	1.05	2.24551
									18	2025-05-04	24	33.63	0	0
									18	2025-05-05	25	41.19	0.6	1.45666
									18	2025-05-06	26	19.22	0.45	2.34131
									18	2025-05-07	27	17.98	0.43	2.39155
									18	2025-05-08	28	22.3	2.76	12.3767
									18	2025-05-09	29	39.15	1.38	3.5249
									18	2025-05-10	30	22.76	1.09	4.7891
									18	2025-05-11	31	41.55	1.62	3.89892
									18	2025-05-12	32	36.58	1.6	4.37397
									18	2025-05-13	33	41.57	1.73	4.16166
									18	2025-05-14	34	29.24	2.3	7.86594
									18	2025-05-15	35	43.23	2.34	5.41291
									18	2025-05-16	36	48.53	2.13	4.38904
									18	2025-05-17	37	40.09	1.81	4.51484
									18	2025-05-18	38	48.68	2.13	4.37551
									18	2025-05-19	39	24.19	0.763	3.1542
									18	2025-05-20	40	37.75	1.244	3.29536
									18	2025-05-21	41	24.65	2.051	8.32049
									18	2025-05-22	42	31.87	1.337	4.19517
									18	2025-05-23	43	19.16	0.944	4.92693
									19	2025-04-11	1	21.97	0.08	0.364133
									19	2025-04-12	2	17.9	0.17	0.949721
									19	2025-04-13	3	35.76	0.22	0.615213
									19	2025-04-14	4	45.77	0.16	0.349574
									19	2025-04-15	5	21.72	0.46	2.11786
									19	2025-04-16	6	31.24	0.2	0.640205
									19	2025-04-17	7	20.15	0.08	0.397022
									19	2025-04-18	8	33.9	0.26	0.766962
									19	2025-04-19	9	32.71	0.53	1.6203
									19	2025-04-20	10	33.57	0.43	1.28091
									19	2025-04-21	11	25.83	0.47	1.81959
									19	2025-04-22	12	42.29	0.9	2.12816
									19	2025-04-23	13	49.12	0.46	0.936482
									19	2025-04-24	14	41.55	0.53	1.27557
									19	2025-04-25	15	42.85	0.47	1.09685
									19	2025-04-26	16	33.95	0.72	2.12077
									19	2025-04-27	17	22.33	0	0
									19	2025-04-28	18	45.85	0.61	1.33043
									19	2025-04-29	19	29.28	0.66	2.2541
									19	2025-04-30	20	21.65	1.17	5.40416
									19	2025-05-01	21	54.9	0.99	1.80328
									19	2025-05-02	22	26.19	1.29	4.92554
									19	2025-05-03	23	58.11	1.54	2.65015
									19	2025-05-04	24	33.96	1.74	5.12367
									19	2025-05-05	25	26.14	2.42	9.25784
									19	2025-05-06	26	22.51	1.4	6.21946
									19	2025-05-07	27	25	5.13	20.52
									19	2025-05-08	28	32.91	3.06	9.29809
									19	2025-05-09	29	37.91	3.19	8.41467
									19	2025-05-10	30	29.38	4.56	15.5208
									19	2025-05-11	31	37.06	1.68	4.53319
									19	2025-05-12	32	36.66	1.68	4.58265
									19	2025-05-13	33	29.31	0.41	1.39884
									19	2025-05-14	34	42.97	2.3	5.35257
									20	2025-04-11	1	23.21	0.17	0.732443
									20	2025-04-12	2	25.76	0	0
									20	2025-04-13	3	19.52	0.05	0.256148
									20	2025-04-14	4	21.23	0.19	0.89496
									20	2025-04-15	5	42.75	0	0
									20	2025-04-16	6	28.02	0	0
									20	2025-04-17	7	17.72	0.06	0.3386
									20	2025-04-18	8	47.73	0.07	0.146658
									20	2025-04-19	9	22.82	0.19	0.832603
									20	2025-04-20	10	31.46	0.2	0.635728
									20	2025-04-21	11	40.57	0.21	0.517624
									20	2025-04-22	12	35.66	0.47	1.318
